1 **Enhanced FcγRIII/CD16 activation by discrete ligands as independent correlates of**  
2 **disease severity in COVID-19 patients**

3  
4 Jakob Ankerhold<sup>1,2,11</sup> & Sebastian Giese<sup>1,2,11</sup> & Philipp Kolb<sup>1,2,11</sup>, Andrea Maul-Pavicic<sup>3,4</sup>,  
5 Nathalie Göppert<sup>1,2</sup>, Kevin Ciminski<sup>1,2</sup>, Clemens Kreutz<sup>5</sup>, Achim Lothar<sup>6,7</sup>, Ulrich Salzer<sup>3</sup>,  
6 Wolfgang Bildl<sup>8</sup>, Tim Welsink<sup>9</sup>, Nils G. Morgenthaler<sup>9</sup>, Andrea Busse Grawitz<sup>10</sup>, Daniela  
7 Huzly<sup>1,2</sup>, Martin Schwemmler<sup>1,2</sup>, Hartmut Hengel<sup>1,2,12</sup>, Valeria Falcone<sup>1,2,12</sup>

8  
9 <sup>1</sup>Institute of Virology, University Medical Center, Albert-Ludwigs-University Freiburg,  
10 Hermann-Herder-Str. 11, 79104 Freiburg, Germany

11 <sup>2</sup>Faculty of Medicine, Albert-Ludwigs-University Freiburg, 79104 Freiburg, Germany

12 <sup>3</sup>Department of Rheumatology and Clinical Immunology, Medical Center-University of  
13 Freiburg, Faculty of Medicine, University of Freiburg, Hugstetterstr. 55, 79106 Freiburg,  
14 Germany

15 <sup>4</sup>Center for Chronic Immunodeficiency (CCI), Medical Center-University of Freiburg, Faculty  
16 of Medicine, University of Freiburg, Breisacherstr. 115, 79106 Freiburg, Germany

17 <sup>5</sup>Institute of Medical Biometry and Statistics, Faculty of Medicine and Medical Center,  
18 University of Freiburg, Stefan Meier Str. 26, 79104 Freiburg, Germany

19 <sup>6</sup>Heart Center Freiburg University, Department of Cardiology and Angiology I, Faculty of  
20 Medicine, University of Freiburg, Hugstetterstr. 55, 79106 Freiburg, Germany

21 <sup>7</sup>Institute of Experimental and Clinical Pharmacology and Toxicology, Faculty of Medicine,  
22 University of Freiburg, Albertstr. 25, 79104 Freiburg, Germany

23 <sup>8</sup>Institute of Physiology II, Faculty of Medicine, University of Freiburg, Hermann-Herder-Str.  
24 Freiburg, Germany

25 <sup>9</sup>InVivo BioTech Services GmbH, 16761 Hennigsdorf, Germany

26 <sup>10</sup>Institute of Clinical Chemistry and Laboratory Medicine, Medical Center - University of  
27 Freiburg, Faculty of Medicine, University of Freiburg, Hugstetterstr. 55, 79106 Freiburg,  
28 Germany

29 <sup>11</sup>contributed equally

30 <sup>12</sup>corresponding authors

31  
32  
33  
34 **One sentence summary**

35 Severity of disease in COVID-19 patients is associated with enhanced CD16 activation by  
36 afucosylated S-specific IgG and CD16-reactive circulating IgG-complexes.

37

38 **Abstract**

39 A dysregulated immune response with high levels of SARS-CoV-2 specific IgG antibodies is  
40 a common and distinctive feature of severe or critical COVID-19. Although a robust IgG  
41 response is typically considered to be beneficial, an overshooting activation mediated by  
42 immune receptors recognizing the Fc part of IgG (FcγRs) is thought to be detrimental and  
43 associated with immunopathology. However, direct evidence of FcγR driven  
44 immunopathology in COVID-19 is still sparse. Here, we used a cell-based FcγR activation  
45 reporter system to systematically analyze SARS-CoV-2 specific IgG responses and IgG-  
46 mediated FcγRIII (CD16) activation profiles in COVID-19 patient cohorts categorized by  
47 severity of disease. We found that increased CD16 activation by SARS-CoV-2 specific IgG is  
48 associated with a known pro-inflammatory IgG modification, namely afucosylation. Further,  
49 we identified CD16-reactive soluble IgG immune complexes (sICs) to be present in the serum  
50 of COVID-19 patients and show that the resulting CD16 activation by sICs is strongly related  
51 to disease severity. Our results provide evidence that CD16 activation by pro-inflammatory  
52 SARS-CoV-2 specific IgG together with circulating sICs is a major contributor to COVID-19  
53 immunopathology. These findings highlight the importance of FcγR driven immunopathology  
54 in COVID-19. Further, our data highly warrant the development of targeted intervention  
55 strategies against IgG driven immunopathology following SARS-CoV-2 infection.

56  
57

## 58 **Introduction**

59 Since the emergence of SARS-CoV-2 in late December 2019<sup>1</sup>, more than 178 million  
60 laboratory confirmed infections (as of June 21, 2021) have been reported, with cases  
61 continuously rising<sup>2</sup>. Accordingly, rapid insights into the disease manifestations and  
62 pathogenesis have been globally obtained. A hallmark of the coronavirus disease 2019  
63 (COVID-19) is a respiratory infection which can progress to an acute respiratory distress  
64 syndrome (ARDS). Next to asymptomatic infections, COVID-19 symptoms differ widely  
65 according to the disease process and may comprise fever, coughing, pneumonia, dyspnea,  
66 hypoxia and lymphopenia<sup>3</sup>. While fever and coughing are common symptoms, pneumonia,  
67 hypoxia, dyspnea, certain organ manifestations and lymphopenia indicate critical or fatal  
68 infections. Pronounced dyspnea can eventually progress to ARDS, a severe complication  
69 frequently observed in critically ill patients<sup>4</sup>. Although disease severity and in particular  
70 breathing difficulties are related to viral load<sup>5</sup>, age<sup>6-8</sup> and underlying medical conditions<sup>7,8</sup>, the  
71 kinetics of respiratory failure strongly suggest an essential role of the host immune  
72 response<sup>3,7</sup>. Typically, aggravation occurs between 9-12 days after symptom onset<sup>8</sup> and  
73 correlates with high levels of SARS-CoV-2 specific IgG antibodies and systemic effects of  
74 pro-inflammatory cytokines such as IL-6 and TNF $\alpha$ <sup>3,9,10</sup>. This cytokine release, primarily the  
75 result of macrophage and T helper (T<sub>H</sub>) cell activation<sup>11</sup>, includes pattern recognition receptor  
76 (PRR) signaling in the context of innate immunity but also Fc $\gamma$  receptor (Fc $\gamma$ R) activation<sup>12</sup>.  
77 Triggered by immune complexes (antibody-antigen complex), the cytokine release following  
78 Fc $\gamma$ R activation represents a potent defense mechanism against invading pathogens. A  
79 prototypical activating Fc $\gamma$ R in this regard is Fc $\gamma$ RIII (CD16) expressed by NK cells and  
80 monocyte-derived macrophages (CD16A)<sup>13</sup> or neutrophils (CD16B, 98% sequence identical  
81 ectodomains). Specifically, CD16 is able to recognize circulating soluble immune complexes  
82 (sICs) as they are formed in certain autoimmune diseases such as lupus<sup>14-17</sup> and viral  
83 infections<sup>18</sup>. Overstimulation of activating Fc $\gamma$ Rs in these cases is associated with disease  
84 severity<sup>18-20</sup> and thus an Fc $\gamma$ R-driven overshooting inflammatory response<sup>12</sup> might be an  
85 explanation for the pronounced immunopathology observed during severe courses of COVID-  
86 19<sup>21</sup>. Consistently, hyper-inflammation in SARS-CoV-1 and MERS infected patients has been  
87 previously proposed as a possible pathogenic factor<sup>22</sup> and could be demonstrated in mice and  
88 macaques infected with SARS-CoV-1<sup>23,24</sup>. Furthermore, N297-dependent glycan-  
89 modifications such as afucosylation within the constant region of SARS-CoV-2 specific IgG  
90 antibodies enhance binding to Fc $\gamma$ Rs, in turn driving inflammation. Enhanced Fc $\gamma$ R activation

91 by low-fucosylated anti-SARS-CoV-2-S IgG leading to excessive alveolar macrophage  
92 activation has specifically been shown to drive severe COVID-19 disease progression<sup>25</sup>.  
93 Therefore we aimed to delineate the contribution of IgG-mediated effector functions  
94 regarding COVID-19 severity in patient cohorts with various severity of SARS-CoV-2  
95 infection. We monitored antigen-specific IgG responses in patients with mild, critical and  
96 severe COVID-19 disease with regard to titer, kinetics and CD16 activation. This revealed a  
97 marked correlation between CD16 activation by patient IgG and severity of disease.  
98 Additionally, we identified circulating sICs to be abundantly present in the serum of critically  
99 and severely diseased patients, but not in the serum of those with a mild disease. As sIC-  
100 mediated CD16 activation independently correlates with disease severity, we provide  
101 evidence that also sIC formation is indicative of disease progression. Our findings enable new  
102 avenues of intervention against COVID-19 and highly warrant further investigation into the  
103 origin and composition of sICs in COVID-19.

104

105

## 106 **Results**

### 107 **Patients and clinical information.**

108 We retrospectively analyzed serial serum samples collected for routine diagnostic testing from  
109 41 patients hospitalized at our tertiary care center between March and June 2020 with SARS-  
110 CoV-2 infection confirmed by real-time PCR. Based on the clinical course, we categorized  
111 patients as either severely diseased (hospitalized with COVID-19 related pneumonia) versus  
112 critically diseased (COVID-19 related pneumonia and eventually in need of invasive  
113 mechanical ventilation). In total, 27 patients with critical and 14 with severe courses of  
114 disease were grouped into separate cohorts (Table 1). Most patients were older than 60 years  
115 with an overall mean age of 68 years (63 years and 76 years in the critically and severely  
116 diseased patients respectively).

117 The majority of patients in both groups had comorbidities of different origin with  
118 cardiovascular diseases including hypertension representing the most frequent pathology  
119 (35/41, 85%). Similar to previous reports, high Interleukin 6 (IL-6) and C-reactive protein  
120 (CRP) levels were associated with severity of disease ( $\bar{\text{IL-6}}$ : 1452.1 pg/ml in the critical  
121 group vs 46.1 pg/ml in the severe group and  $\bar{\text{CRP}}$ : 162.2 mg/l vs 65.3 mg/l  $\bar{\text{IL-6}}$  13-25 days  
122 post symptom onset respectively). Similarly, procalcitonin, a biomarker of microbial  
123 coinfection, was significantly higher in critically diseased patients ( $\bar{\text{value}}$  9.9 ng/ml vs 0.17  
124 ng/ml). Bacterial superinfection represented a further complication in 39% of the patients and



125 was only slightly more frequent in patients with critical disease (11/27, 41% vs 5/14, 33%).  
126 More than half of the patients (59%) were treated with hydroxychloroquine/Kaletra®, (18/27,  
127 67% in the critical group vs 6/14, 43% in the severe group). Notably, at the time of serum  
128 acquisition, only one patient received steroid treatment, which was given due to underlying  
129 chronic obstructive pulmonary disease. Finally, mortality rate was 37% (10/27) in critically  
130 and 7% (1/14) in severely diseased patients.

131  
132 **Kinetics of IgG antibody responses following symptom onset across severe and critical**  
133 **courses of disease.**

134 It has been proposed that elevated SARS-CoV-2 antibody titers are associated with disease  
135 severity<sup>10</sup> and may play a role not only in the clearance but also in the pathogenesis of SARS-  
136 CoV-2 infection<sup>26</sup>. We therefore initially analyzed the levels and kinetics of SARS-CoV-2  
137 specific IgG in serial serum samples from patients hospitalized with critical (n=27) or severe  
138 (n=14) illness, a setting we also used in the following experiments. A total of 125 (critically  
139 diseased) and 79 (severely diseased) serum samples, obtained from the aforementioned  
140 patients at different time points within 6-25 days following symptom onset were analyzed by  
141 commercially available S1- and N- specific ELISA-based assays. Assay specificity was  
142 confirmed analyzing healthy donor (HD) serum samples (n=30) as negative control (Figure 1-  
143 figure supplement 1 A, B). Most patients developed detectable SARS-CoV-2 specific IgG  
144 responses within 9-14 days after symptom onset. SARS-CoV-2 specific IgG gradually  
145 increased over time in both severely and critically diseased patients reaching a plateau at 18-  
146 20 days after symptom onset (Figure 1 A, B). Varying antibody response kinetics were  
147 observed for each individual patient (Figure 1-figure supplement 2 A-D) with anti-N IgG  
148 titers rising significantly earlier than anti-S1 IgG (12.5 days  $\pm$  3.3 days vs 10.6  $\pm$  3.8; p=  
149 0.0091). A trend towards earlier seroconversion for anti-S1 IgG could be observed in  
150 critically diseased patients (mean time of seroconversion 11.4  $\pm$  3.0 days in critically diseased  
151 patients vs 12.9  $\pm$  3.8 days for severely diseased patients; p = 0.24), whereas time of  
152 seroconversion for anti-N IgG was similar in both groups (10.1  $\pm$  3.2 and 10.4  $\pm$  4.2 days for  
153 critically and severely diseased patients, respectively; p = 0.83). S1- and N-specific IgG levels  
154 at plateau did not significantly differ between the two groups. No significant difference  
155 between deceased and discharged patients was measured 13-25 days after symptom onset  
156 (Figure 1- figure supplement 1 C, D, E). Next, we evaluated and compared the neutralizing  
157 capacity of SARS-CoV-2 IgG in either critically versus severely diseased patients in a plaque-  
158 reduction assay (Figure 1 C). All patients mounted a robust neutralizing antibody response

159 (91%  $\pm$  10.5 % neutralization at a 1:64 serum dilution), with peaking titers at 18-20 days  
160 following symptom onset. Of note, two critically diseased patients developed a neutralizing  
161 response already at 6-8 days after symptom onset. In summary, we observed only minor  
162 differences in cohort wide kinetics of S1- or N- specific IgG levels between patients  
163 hospitalized with severe or critical clinical courses indicating that antibody levels per se did  
164 not correlate with severity of disease in our study.

165

### 166 **Patients with severe COVID 19 show enhanced CD16 activation by S-specific IgG** 167 **antibodies.**

168 Fc $\gamma$ RIII (CD16) activation initiates multiple protective effector functions such as antibody-  
169 dependent cellular cytotoxicity (ADCC) by natural killer (NK) cells as well as antibody-  
170 dependent cytokine and chemokine secretion by NK cells and macrophages<sup>12,27</sup>. However,  
171 excessive Fc $\gamma$ R stimulation can have severe adverse effects such as elevated cytokine release  
172 as observed in autoimmune diseases or viral infections<sup>12</sup>. Therefore, we hypothesized that an  
173 exaggerated Fc $\gamma$ R mediated activation triggered by SARS-CoV-2 specific IgG might  
174 contribute to the exacerbation of COVID-19 in severely compared to critically diseased  
175 patients. To address this, we analyzed the ability of SARS-CoV-2 specific antibodies to  
176 activate CD16 (158V) using a previously established cell-based reporter system<sup>28</sup> (Figure 2-  
177 figure supplement 1A). Considering the typically late time point of health deterioration, we  
178 performed an analysis of CD16 activation triggered by SARS-CoV-2 specific IgG on serum  
179 samples obtained 13-25 days following symptom onset (Figure 2). Sera were analyzed at a  
180 1:500 dilution to stay within the dynamic range of detection (Figure 2- figure supplement 2).  
181 Depending on the availability of sample material 2-8 samples/patient/time-point were  
182 included in this analysis. If available in sufficient quantity, sera were reanalyzed.  
183 Reproducibility was tested using available serum surplus (Figure 2- figure supplement 3).  
184 Sera from 28 patients with mild SARS-CoV-2 infection and 30 healthy blood donors were  
185 included for reference. Semi-quantitative assessment of IgG titers using antigen-specific  
186 ELISA revealed comparable levels between critically and severely diseased patient cohorts  
187 (Figure 2 A, B, C). In contrast, S- (p=0.0147) and RBD-specific (p=0.0120) but not N-  
188 specific IgG-mediated CD16 activation was significantly increased in critically compared to  
189 severely diseased patients (Figure 2 D-F). Furthermore, normalizing CD16 activation to  
190 antigen-specific IgG titers, revealed significantly stronger CD16 activation by S- (p=0.0033)  
191 and N-specific (p=0.006) IgG compared to mildly diseased patients (Figure 2 G-I).  
192 Intriguingly, we observed a heterogeneous CD16 activation pattern characterized by either

193 high or low CD16-activating sera irrespective of the clinical manifestation (Figure 2 D-F).  
194 Overall, a significant positive correlation could be determined between anti-SARS-CoV-2  
195 antigen IgG titers and CD16 activation (Figure 2-figure supplement 4). Our data document a  
196 sustained CD16 activation by SARS-CoV-2 specific antibodies particularly in patients  
197 suffering from critical COVID-19 disease. Based on these results we confirmed the notion  
198 that elevated Fc $\gamma$ RIII activation by S- and or RBD-specific IgG might contribute to disease  
199 severity of COVID-19.

200

201 **Enhanced Fc $\gamma$ -afucosylation of S-specific IgG in critically and severely diseased patients**  
202 **results in increased CD16 activation.**

203 We speculated that differences in Fc $\gamma$  mediated effector functions might contribute to disease  
204 severity of COVID-19 and thus compared CD16 high- versus CD16 low-activating patient  
205 sera regarding their SARS-CoV-2 specific IgG core fucosylation. Inspired by previous  
206 findings<sup>29-31</sup> we focused on determining IgG core fucosylation of S- and N- specific SARS-  
207 CoV2 IgG. To determine IgG core fucosylation we adapted a lectin-based ELISA preceded by  
208 antigen-specific antibody purification from immobilized SARS-CoV-2-antigen. Analysis of  
209 anti-S and anti-N IgG core fucosylation was performed on serum pools containing five sera of  
210 either critically or severely diseased patients obtained 13-25 days post symptom onset. Given  
211 the aforementioned heterogeneity in CD16-activation, we analyzed pools of 5 sera of either  
212 critically or severely diseased patients characterized by either high or low CD16-activation. To  
213 stay within the dynamic detection range, relative fucosylation was analyzed at a dilution of  
214 1:4 (Figure 3). When analyzing serum pools from critically and severely diseased patients we  
215 determined a significantly lower level of core fucosylation among the high CD16 activators  
216 (Figure 3, plain-colored bars) compared to the low CD16 activators (Figure 3, shaded bars).  
217 This applied for both the S- and N-specific antibodies. These results are in line with  
218 previously published findings regarding the effect of Fc $\gamma$ -afucosylation on CD16 effector  
219 functions<sup>29,32</sup> and recapitulate similar findings in the context of COVID-19<sup>30,31</sup>. However, we  
220 did not observe significant differences between critically and severely diseased patients.

221

222 **COVID-19 disease severity correlates with an increase in CD16-reactive soluble IgG**  
223 **complexes.**

224 Aside from afucosylation, it has been proposed that uncleared antigen-antibody immune  
225 complexes (ICs) might further exacerbate inflammation, explaining complications observed in  
226 COVID-19 such as cytokine storm, systemic vasculitis, microvascular thrombosis and organ

227 failure<sup>33-35</sup>. However, the presence of circulating, soluble ICs (sICs) in critically or severely  
228 diseased patients has not been conclusively shown yet. As extensive FcγR activation by sICs  
229 might contribute to the severe systemic inflammatory state occurring in some COVID-19  
230 patients with prolonged disease, we surmised that sICs might be a putative explanation for the  
231 marked differences in IL-6, PCT and CRP levels between critically and severely diseased  
232 patients (Table 1). We thus set out to characterize our patient cohort regarding the presence of  
233 sICs in serum samples taken at various time points during disease and after hospitalization. To  
234 this end, we deployed a novel cell-based reporter assay developed to quantify CD16 (158V)  
235 activation by IgG-containing sICs<sup>17</sup>. As recently shown, the assay does not react to  
236 monomeric IgG or small dimeric complexes in solution, but specifically identifies multimeric  
237 sICs and has been successfully used to identify sICs in patients with systemic lupus  
238 erythematosus (SLE)<sup>16</sup>. Moreover, the assay is sensitive to sICs size with larger complexes  
239 leading to stronger receptor activation compared to small complexes. Analysis of serum  
240 samples, obtained 13-25 days after symptom onset, revealed the presence of highly CD16-  
241 reactive sICs in SARS-CoV-2 infected patients compared to healthy individuals (Figure 4A).  
242 Next, we compared sIC-mediated CD16 activation between COVID-19 patients of varying  
243 disease severity. While all COVID-19 patient groups tested positive for reactive sICs  
244 compared to healthy control (HD) sera, we found that critically diseased patients show a  
245 striking increase in reactive sICs compared to patients with severe or mild disease (Figure  
246 4B). Only 6 out of 27 patients with critical disease (22%) showed no sIC-mediated CD16  
247 activation. As we did not detect reactive sICs in the serum of 47 patients with acute  
248 respiratory distress syndrome (ARDS; mean age 57.5 years) in response to infections of  
249 different etiology including CMV reactivation, HIV, influenza or TBC infection, we conclude  
250 that the formation of reactive sICs is associated with severe SARS-CoV-2 disease (Figure 4-  
251 figure supplement 1). Longitudinal analysis of reactive sICs in the serum of critically or  
252 severely diseased patients revealed high CD16 activation levels in 4 critically diseased  
253 patients already 6 to 8 days after symptom onset (Figure 4C). Of note, 2 of 4 patients with an  
254 early increase of circulating reactive sIC eventually died. sIC-mediated CD16 activation  
255 persisted in 14 of 19 critically diseased patients at high levels until day 26 after symptom  
256 onset. sIC-mediated CD16 activation in severely diseased patients was slightly delayed  
257 compared to critically diseased patients and was first detected in 4 patients 9-11 days after  
258 symptom onset (Figure 4C). Only 4 of 14 patients with severe disease showed detectable sIC-  
259 mediated CD16 activation. To verify that sICs represent the CD16-reactive component in the  
260 serum of COVID-19 patients, we analyzed serum-mediated CD16 activation before and after

261 PEG8000-precipitation. This treatment was previously shown to selectively precipitate large  
262 IgG complexes from solution<sup>36</sup>. For this analysis, pools of 8 sera, showing either high (IC+)  
263 or no (IC-) CD16 activation, were compared. Sera from healthy donors (HD) served as a  
264 negative control. Compatible with the hypothesis of serum-derived sICs driving CD16  
265 activation, no activation was observed following incubation with 3.5% PEG8000 (Figure 4-  
266 figure supplement 2 A). To ensure, that the treatment did not precipitate monomeric IgG, we  
267 tested the depleted sera for remaining S1- and N-specific IgG. As depicted S1- and N-  
268 specific IgG could still be detected at high levels in samples treated with 3.5% PEG8000  
269 (Figure 4-figure supplement 2 B). When resolving sIC-mediated CD16 activation over the  
270 complete time of hospitalization for select patients from which samples at different time  
271 points were available, we observed that sIC reactivity follows a similar course as anti-S1 IgG  
272 titers in ELISA (Fig. 4-figure supplement 3). While this might imply that sIC formation  
273 involves SARS CoV-2 S1 antigen, we were not able to identify any SARS-COV-2-derived  
274 antigens in PEG8000-precipitated sICs using tandem mass spectrometry (data not shown). To  
275 further exclude the formation of multimeric sICs formed from circulating S1 antigen, we also  
276 specifically targeted S1 for precipitation from patient serum using biotinylated S1-specific  
277 monoclonal antibodies. However and in line with our previous approach, S1-specific  
278 precipitation using streptavidin-sepharose beads and subsequent mass spectrometry analysis  
279 for any SARS-CoV-2-specific antigens in sICs remained inconclusive (data not shown).  
280 Recently, the role of neutrophil mediated intravascular NETosis was found to play a critical  
281 role in thrombosis formation and subsequent organ damage observed in severe clinical forms  
282 of COVID-19<sup>37</sup>. Since this process could mediate the formation of aggregated IgG as a form  
283 of sICs, we next tested whether Benzonase® nuclease treatment of patient serum would  
284 dissolve reactive sICs. To this end we tested sera from critically diseased patients or healthy  
285 individuals and compared CD16 reactivity before and after nuclease treatment (Figure 4-  
286 figure supplement 4). Nuclease activity in diluted human serum was controlled using plasmid  
287 DNA for reference. This revealed that nucleic acid was not involved in the formation of  
288 CD16-reactive sICs in critically diseased patients. Finally, we tested pooled patient sera for  
289 autoantibodies against a panel of prototypical autoantigens associated with autoimmune  
290 disease including anti-nuclear autoantibodies (ANA) by indirect immunofluorescence,  
291 dsDNA autoantibodies by ELISA and autoantibodies against the extractable nuclear antigens  
292 (nRNP/Sm, Sm, SS-A, Ro-52, SS-B, Scl-70, PM-Scl, Jo-1, CENP B, PCNA, nucleosomes,  
293 histones, ribosomal P-protein, AMA-M2, DFS70) by dot blot in case SARS-CoV-2 infection  
294 triggers autoantibody formation and possible sIC formation. However, no significant

295 autoantibody titers could be detected in any sera pool (data not shown). Although we were not  
296 able to identify their origin, our data clearly indicates the presence of circulating sICs in  
297 COVID-19 patients with an increase in CD16-reactive sICs corresponding with severity of  
298 disease. Accordingly, we conclude that circulating sICs are a hitherto unknown, yet  
299 contributing factor to COVID-19 disease severity and, regarding infectious diseases, our  
300 findings represent an observation unique to severely diseased COVID-19 patients.

301

## 302 **Discussion**

303 We collected and analyzed data from 41 COVID-19 patients hospitalized at the University  
304 Hospital Freiburg. Patients were categorized by severity of disease into severely (n=14) and  
305 critically diseased patients (n=27). Both groups were of comparable average age and had a  
306 similar male-to-female ratio. For comparison we also analyzed 28 mildly diseased and 30  
307 healthy individuals. As key findings we identify the potential of *de novo* produced SARS-  
308 CoV-2 IgG and the presence of soluble immune complexes activating FcγRIII/CD16 as  
309 independent risk factors closely associated with severe courses of COVID-19.

310

### 311 **CD16 activation by SARS-CoV-2 specific IgG is increased in critically diseased patients.**

312 FcγR activation by anti-viral IgG represents a potent defense mechanism, directing the  
313 immune response to the site of viral replication<sup>38-41</sup>. However, persistent infection can lead to  
314 prolonged stimulation of FcγRs, driving an overshooting and potentially damaging  
315 inflammatory response<sup>12,18</sup>. A potential key component in prolonged inflammation following  
316 SARS-CoV-2 infection is FcγR mediated cytokine and chemokine release by several immune  
317 cells as their activation has been implied in severity of disease<sup>29,31,42</sup>. Along these lines,  
318 glycan profiles of anti-SARS-CoV2 IgG have been identified as major correlates of COVID-  
319 19 disease progression<sup>29-31</sup>. As these modifications particularly affect CD16 activation, we  
320 characterized our patient groups with regard to CD16 activation by S- and N-specific IgG and  
321 determined significantly increased CD16 activation by S, N and RBD specific IgG in sera  
322 from severely and critically diseased patients compared to mildly diseased patients. We  
323 further identified a higher level of afucosylation being indicative of COVID-19 severity,  
324 which is in line with previous studies<sup>29-31</sup>, and now directly link this general observation to an  
325 increased CD16 activation. Taken together, we find that CD16 activation by SARS-CoV-2-  
326 specific IgG can be directly correlated to IgG glycan modifications and disease severity.

327



## 328 **Circulating sICs contribute to COVID-19 disease severity**

329 Based on the herein presented results identifying CD16 activation to be a major correlate of  
330 disease severity, we further explored this using an adapted FcγR activation assay optimized to  
331 measure soluble immune complexes (sICs)<sup>17</sup>. Indeed, we provide first evidence of such  
332 circulating sICs in the serum of COVID-19 patients and experimentally confirm previous  
333 hypotheses suggesting immune complexes as potential drivers of disease progression in  
334 COVID-19<sup>33-35</sup>. In fundamental contrast to opsonized antigens decorating virus-infected cells,  
335 sICs become distributed systemically. Thus constitutive activation of CD16<sup>+</sup> monocytes,  
336 granulocytes and NK cells could readily explain systemic responses which potentiate local  
337 inflammation in virus-infected tissues intensifying organ damage and dysfunction. Although  
338 the origin of the circulating immune complexes still remains elusive, we clearly show that the  
339 presence of IgG-containing sICs is restricted to SARS-CoV-2 infection and that complexed  
340 IgG is directly responsible and sufficient for the observed CD16 activation by patient serum.  
341 As we find sIC reactivity to roughly follow SARS-CoV-2 specific IgG responses, we  
342 speculated that circulating S or shed S1-antigens might still be involved in sIC formation,  
343 albeit in a form we were not able to detect. In support of this hypothesis, it has recently been  
344 published that circulating S-antigen can be detected in the plasma of individuals who received  
345 two doses of the mRNA-1273 (Moderna) vaccine<sup>43</sup>. S1 shedding was also reported to play a  
346 role in virion infectivity as the introduction of a D614G mutation significantly enhanced  
347 infectivity due to an increased S-protein density in the virion<sup>44</sup>. Finally, others have identified  
348 potential mechanisms leading to S-antigen shedding in viral infection and proposed a link  
349 between the presence of circulating S-antigen and disease severity<sup>45</sup>. Alternatively, IgG auto-  
350 antibodies of diverse specificity might cause the formation of the CD16 triggering sICs we  
351 herein identified. In fact, several studies have described that auto-antibodies can be frequently  
352 detected in critically ill COVID-19 patients<sup>46-48</sup>. In particular, very recent work shows that an  
353 acute SARS-CoV-2 infection triggers the *de novo* IgG production against multiple  
354 autoantigens. Interestingly, 60-80% of all hospitalized COVID-19 patients had anti-cytokine  
355 IgG (ACA)<sup>49</sup>. The authors show that ACA levels and specificity change over time during  
356 hospitalization, suggesting ACA induction in response to viral infection and inflammation.  
357 Further, it has been shown that pre-existing neutralizing anti-type I interferon antibodies,  
358 which can be found in about 10% of patients with severe COVID-19 pneumonia, are related  
359 to the highest risk of developing life-threatening COVID-19 disease<sup>50</sup>. Therefore, the *de novo*  
360 induction of anti-cytokine auto-antibodies in a large proportion of hospitalized COVID-19  
361 patients as described by Chang et al<sup>49</sup>, might indeed represent the origin of circulating sICs in



362 COVID-19. In such a scenario, immune responses are deviated first by depletion of important  
363 cytokines and second through the formation of pathological sICs which trigger immunological  
364 damage. We show that critically diseased patients show significantly higher levels of reactive  
365 sICs compared to less severely diseased patients. In addition, sIC responses can be found  
366 significantly earlier in critically diseased patients, which was associated with a fatal disease  
367 outcome. We also find that patients show a wide range of sIC reactivity. According to the  
368 Heidelberger-Kendall precipitation curve<sup>51</sup>, sIC size is critically dependent on the  
369 antigen:antibody stoichiometry. As the used Fc $\gamma$ R activation assay is sensitive to sIC size<sup>17</sup>, it  
370 is highly likely that this also plays a role when measuring COVID-19 patient serum. As some  
371 patients show high anti-SARS-CoV-2-S IgG titers in the absence of sICs and vice versa we  
372 speculate that sIC size plays a role in CD16 reactivity. Therefore, we propose that in addition  
373 to the presence of sICs, the size of sICs plays a role in CD16 driven COVID-19  
374 immunopathology.

375 Taken together, we conclude that CD16 activation in COVID-19 disease is governed by IgG  
376 glycan profiles and sIC formation (Figure 5) and plays a major role in disease progression and  
377 severity. Indeed, there is evidence in this direction from a clinical perspective provided by a  
378 recent study that finds the administration of intravenous immunoglobulin (IVIg) to alleviate  
379 COVID-19 disease<sup>52</sup>. Although no direct proof, this heavily implies that the saturation of  
380 Fc $\gamma$ Rs mitigates immunopathology. Therefore, our findings provide an explanation for the  
381 sustained immunopathology following SARS-CoV-2 infection as well as for the efficacy of  
382 IVIg treatment in severe to critical COVID-19 disease.

383

384

## 385 **Material and Methods**

386

### 387 **Subjects and specimens**

388 Between March 2020 and April 2020, 41 patients with SARS-CoV-2 infection confirmed by  
389 real-time PCR were hospitalized in the University Medical Center, Freiburg. Serum samples  
390 were collected during hospitalization for routine laboratory testing. Clinical data were  
391 obtained from electronic medical records. A total of 27 patients necessitating invasive  
392 mechanical ventilation were included in the critical group. Fourteen patients requiring O<sub>2</sub>  
393 supplementation were included in the severe group. Additionally, serum samples from 29  
394 mild COVID-19 cases and 30 healthy donor (HD) plasma samples were used as controls in  
395 this study.

396

### 397 **Cell culture**

398 African green monkey kidney Vero E6 cells (ATCC CRL-1586) were cultured at 37°C in  
399 Dulbecco's Modified Eagle Medium (DMEM) supplemented with 10% (vol/vol) fetal calf  
400 serum (FCS, Biochrom), sodium pyruvate (1x, Gibco) and 100 U/ml penicillin-Streptomycin  
401 (Gibco). BW5147 mouse thymoma cells (BW, obtained from ATCC: TIB-47) were stably  
402 transduced with human FcγR as previously described<sup>53</sup>. Cells were maintained at 3x10<sup>5</sup> to  
403 9x10<sup>5</sup> cells/ml in Roswell Park Memorial Institute medium (RPMI GlutaMAX, Gibco)  
404 supplemented with 10% (vol/vol) FCS, sodium pyruvate (1x, Gibco), 100 U/ml penicillin-  
405 Streptomycin (Gibco) β-mercaptoethanol (0.1 mM, Gibco). Cells were cultured at 37°C, 5%  
406 CO<sub>2</sub>. All cell lines were routinely tested for mycoplasma.

407

### 408 **Monitoring of antibody response to SARS-CoV-2 by ELISA**

409 Serum IgG antibody titers targeting S1- and N-SARS-CoV-2 proteins were measured using  
410 commercial enzyme-linked immunosorbent assay (ELISA). Anti-S1- SARS-CoV-2 IgG was  
411 measured by the anti-SARS-CoV-2 ELISA (IgG) Euroimmune Kit (Euroimmune, Lübeck,  
412 Germany) according to manufacturer's protocol. Results, expressed as arbitrary units (AU),  
413 were evaluated semi-quantitatively by calculation of the ratio of the extinction of the control  
414 or patient sample over the extinction of the calibrator. This ratio is interpreted as follows: <  
415 0.8 negative; ≥ 0.8 to <1.0 borderline; ≥ 1.1 positive. Anti-N SARS-CoV-2 IgG was detected  
416 using the recomWell SARS-CoV-2 IgG Kit (Mikrogen Diagnostik GmbH, Neuried,  
417 Germany) according to manufacturer's protocol. The corresponding antibody activity  
418 expressed in AU/ml is calculated using the formula (absorbance of sample / absorbance of  
419 cut-off) × 20. Result are interpreted as follow: < 20 negative; ≥ 20 to < 24 borderline; > 24  
420 positive. IgG against the SARS-CoV-2 Spike Glycoprotein Receptor Binding Domain (RBD)  
421 were detected using SARS-CoV-2 IgG ELISA Reagent Set, kindly provided by InVivo  
422 (InVivo Biotech Services GmbH, Hennigsdorf, Germany) according to manufacturer's  
423 protocol.

424

### 425 **Fcγ receptor activation assay**

426 FcγRIIIA (CD16A, 158V) activation was measured by a cell-based assay as previously  
427 described<sup>28</sup>. For detection of anti-S and anti-RBD-specific FcγR activation we utilized SARS-  
428 CoV-2-S- and RBD-coated plates (kindly provided by InVivo Biotech Services GmbH,  
429 Hennigsdorf, Germany). The recombinant (S)-protein was produced under serum-free

430 conditions in mammalian cells and contains amino acid residues 1 to 1213 of the SARS-CoV-  
431 2 Wuhan-Hu-1-isolate (GenBank annotation QHD43416.1). The furin cleavage site was  
432 mutated, two mutations for protein stabilization were included, and the C-terminal domain  
433 was replaced by a T4 trimerization sequence and a C-terminal hexa-His-Tag<sup>54</sup> The  
434 recombinant RBD-protein represented amino acids 319 to 541 of the (S)-protein mentioned  
435 before. Both recombinant proteins were purified using immobilized metal exchange  
436 chromatography (IMAC) and preparative SEC under standard conditions in a regulated  
437 environment. Microtiter plates were coated using 0.2 µg recombinant (S)-protein or RBD-  
438 protein per well. N-specific FcγR activation was determined using plates coated with SARS-  
439 CoV-2-N (Mikrogen Diagnostik GmbH, Neuried, Germany). Respective plates were  
440 subsequently incubated with serial dilutions of SARS-CoV-2 positive sera or control sera in  
441 RPMI supplemented with 10% (vol/vol) FCS for 30 min at 37°C. All wells were thoroughly  
442 washed before co-cultivation with BW5147 reporter cells for 16 h at 37°C, 5% CO<sub>2</sub>. Cross-  
443 link activation of reporter cells was performed by direct coating of target antibody to ELISA  
444 plate (Nunc Maxisorp; 96 well, flat transparent), followed by a blocking step and incubation  
445 with  $2 \times 10^5$  reporter cells per well. For all activation assays, mouse IL-2 secretion was  
446 quantified by anti-IL-2 ELISA, as described earlier. FcγRIIIA (CD16A) activation by sICs  
447 was measured by a recently developed cell-based assay<sup>17</sup>. Briefly,  $2 \times 10^5$  BW5147-CD16  
448 reporter cells were incubated with SARS-CoV-2 sera in a total volume of 200 µl for 16 h at  
449 37°C, 5% CO<sub>2</sub>. Incubation was performed in a 96-well ELISA plate (Nunc Maxisorp) pre-  
450 treated with PBS containing 10% FCS for 1 h at 4°C to avoid direct binding of serum IgG to  
451 the plate. Reporter cell mIL-2 secretion was quantified via ELISA as described previously<sup>28</sup>.

452

#### 453 **Purification of SARS-CoV2-S and -N specific antibodies from serum**

454 SARS-CoV-2-specific antibodies were purified using SARS-CoV-2 spike protein (S)-coated  
455 plates (kindly provided by InVivo BioTech Services) and - nucleocapsid (N) - coated plates  
456 recomWell SARS-CoV-2 IgG (Mikrogen Diagnostik GmbH, Neuried, Germany). Patient sera  
457 were diluted 1:5 in 100 µl (two wells per serum sample) and incubated for one hour at 37°C  
458 with the S- and N-precoated plates. After washing using PBS-T (0.05% Tween 20) 100 mM  
459 formic acid (30 µl/well) was added and incubated for 5 min on an orbital shaker at room  
460 temperature (RT) to elute bound IgG. Following pH neutralization using TRIS buffer (1 M),  
461 the eluates were either directly processed or stored at 4°C.

462

#### 463 **Quantitation of antigen-specific IgG amount**

464 In order to determine the relative S1- and N-SARS-CoV-2 specific IgG antibody  
465 concentration of the generated eluates, S1- and N-ELISA were performed by the anti-SARS-  
466 CoV-2 ELISA (IgG) Euroimmune Kit (Euroimmune, Lübeck, Germany) and anti-N SARS-  
467 CoV-2 IgG ELISA (recomWell SARS-CoV-2 IgG Kit (Mikrogen Diagnostik GmbH,  
468 Neuried, Germany) as aforementioned.

469

#### 470 **Analysis of antigen-specific IgG-Fcγ fucosylation**

471 Fucosylation levels of S- and N-specific IgG were measured using a lectin-based ELISA  
472 assay. Briefly, 96-well Maxisorb plates (Nunc®) were coated with 50µl/well anti-human IgG-  
473 Fab fragment (MyBiosource, MBS674607) at a concentration of 2 µg/ml, diluted in PBS for  
474 one hour at 37°C. After three washing steps with PBS-T (0.05% Tween20) unspecific binding  
475 sites were blocked adding 300 µl/well Carbo-free™ blocking solution (VectorLab, Inc., SP-  
476 5040, LOT: ZF0415) for one hour at room temperature. After three further washing steps,  
477 eluted antibodies were 2-fold serially diluted with PBS in a total volume of 30 µl/well and  
478 incubated for one hour at 37°C and 5% CO<sub>2</sub>. After washing (3x) using PBS-T, 50 µl/well of 4  
479 µg/ml biotinylated Aleuria Aurantia lectin (AAL, lectin, VectorLab, B-1395) diluted in lectin  
480 buffer (10 mM HEPES, 0.1 mM CaCl<sub>2</sub>, 0.15 M NaCl, 0.1% Tween20) was added and  
481 incubated for 45 min at room temperature (RT). Following another three washing steps using  
482 PBS-T, Streptavidin-Peroxidase Polymer (Sigma, S 2438), at 1 µg/ml final concentration  
483 diluted in LowCross-HRP®-buffer (Candor, Order #: 200 500) was added and incubated for  
484 one hour at RT. After washing five times with PBS-T, 50 µl/well of 1-Step™ Ultra TMB-  
485 ELISA Substrate Solution (ThermoFisher, 34028) was applied and the enzyme-substrate  
486 reaction was stopped after six minutes using 50 µl/well sulphuric acid (1 M H<sub>2</sub>SO<sub>4</sub>).  
487 Quantification of absorbance, OD<sub>450nm</sub>, was performed using a Tecan M2000.

488

#### 489 **PEG Precipitation**

490 Sera pools, consisting of eight different sera per pool, were diluted with varying amounts of  
491 PEG8000, in order to reach a final PEG8000 concentration of 1, 2, 3.5, 5 and 7.5%  
492 respectively. Mixtures were vortexed and incubated overnight at 4°C. For supernatant  
493 analysis, precipitates were sedimented via centrifugation at 13.000 rpm for 30 minutes at 4°C.  
494 For Mass Spectrometry analysis, PEG8000-precipitated sICs were shortly run into 10%  
495 polyacrylamide gels. After over-night fixation (40% ethanol, 10% acetic acid, 50% water) and  
496 washing (3x), complete lanes were excised.

497

## 498 **Benzonase treatment of sera**

499 Serum from six individual patients containing CD16-reactive soluble immune complexes,  
500 were treated with 250 units (U) of Benzonase Nuclease (Sigma-Aldrich Chemie GmbH,  
501 Munich Germany) for 1 h at 4°C. After treatment, sera were titrated in complete BW5147  
502 culture medium and tested for CD16 reactivity. Non-treated sera served as control. To verify  
503 Benzonase activity in the presence of human serum, 3 µg of pIRES-eGFP plasmid DNA  
504 (Addgene) were digested with 250 U of Benzonase. Successful nucleic acid digestion was  
505 visualized using a 1% agarose gel stained with Midori Green.

506

## 507 **Immune precipitation**

508 For mass spectrometry analysis of SARS-CoV2-S specific precipitates, individual sera  
509 containing CD16-reactive soluble immune complexes were subjected to immune precipitation  
510 (IP) using Pierce MS-compatible magnetic IP kit (ThermoFisher Scientific, Darmstadt,  
511 Germany) according to manufacturer's protocol. Briefly 250 µl serum was incubated  
512 overnight at 4°C with 5 µg of biotinylated anti-RBD-specific TRES-1-224.2.19 mouse  
513 monoclonal antibody or TRES-II-480 (isotype control) (kind gift of H.M. Jäck, Erlangen)  
514 before addition of streptavidin magnetic beads. Beads were subsequently collected via  
515 centrifugation and elution buffer was added to detach putative precipitated antigen. The  
516 elution was dried in a speed vacuum concentrator and shortly run into 10% polyacrylamide  
517 gels. After over-night fixation (40% ethanol, 10% acetic acid, 50% water) and washing (3x),  
518 complete lanes were excised. Antibody biotinylation was performed using a Pierce antibody  
519 biotinylation Kit for IP (ThermoFisher Scientific, Darmstadt, Germany) according to  
520 manufacturer's protocol.

521

## 522 **Mass Spectrometry**

523 Proteins were in-gel digested with sequencing grade modified trypsin (Promega GmbH,  
524 Walldorf, Germany) similar to the procedure described by Pandey et al.<sup>55</sup>. Vacuum-dried  
525 peptides were dissolved in 0.5% trifluoroacetic acid, loaded onto a trap column (C18  
526 PepMap100, 5 µm particles, Thermo Fisher Scientific GmbH, Dreieich, Germany) with  
527 0.05% trifluoroacetic acid (4 min, 10 µL/min) and separated on a C18 reversed phase column  
528 (SilicaTip™ emitter, 75 µm i.d., 8 µm tip, New Objective, Inc, Littleton, USA, manually  
529 packed 23 cm with ReproSil-Pur ODS-3, 3 µm particles, Dr. A. Maisch HPLC GmbH,  
530 Ammerbuch-Entringen, Germany; flow rate: 300 nL/min). For sample injection and multi-  
531 step gradient formation (eluent "A": 0.5% acetic acid in water; eluent "B": 0.5% acetic acid in

532 80% acetonitrile / 20% water; gradient length / acquisition time: 100 min or 175 min) an  
533 UltiMate 3000 RSLCnano system (Thermo Fisher Scientific GmbH, Dreieich, Germany) was  
534 used. Eluting peptides were electrosprayed at 2.3 kV via a Nanospray Flex ion source into a Q  
535 Exactive HF-X hybrid quadrupole-orbitrap mass spectrometer (both Thermo Fisher Scientific  
536 GmbH, Dreieich, Germany) and analyzed by data-dependent acquisition with HCD (higher  
537 energy collisional dissociation) fragmentation of doubly, triply and quadruply charged ions  
538 (loop count and dynamic exclusion dependent on the gradient length). Peak lists were  
539 generated with ProteoWizard msConvert (<http://proteowizard.sourceforge.net/>; version  
540 3.0.11098), linear shift mass recalibrated (after a preliminary database search) using in-house  
541 developed software and searched against a database containing the SARS-CoV-2 UniProtKB  
542 reference proteome (proteome ID: UP000464024), all human UniProtKB/Swiss-Prot entries,  
543 and optionally (to reduce the number of incorrectly assigned matches) selected bacterial  
544 proteins (finally the *Pseudomonas fluorescens* (strain SBW25) reference proteome;  
545 proteome ID: UP000002332) with Mascot 2.6.2 (Matrix Science Ltd, London, UK; peptide  
546 mass tolerance:  $\pm 5$  ppm; fragment mass tolerance:  $\pm 20$  mmu; one missed trypsin cleavage  
547 and common variable modifications allowed).

548

#### 549 **Neutralization assay**

550 Serum neutralization capacity was analyzed as previously described<sup>56</sup>. Briefly, VeroE6 cells  
551 were seeded in 12-well plates at a density of  $2.8 \times 10^5$  cells/well 24 h prior to infection. Serum  
552 samples were diluted at ratios of 1:16, 1:32 and 1:64 in 50  $\mu$ L PBS total volume. Negative  
553 controls (PBS without serum) were included for each serum. Diluted sera and negative  
554 controls were subsequently mixed with 90 plaque forming units (PFU) of authentic SARS-  
555 CoV-2 (B.1) in 50  $\mu$ l PBS (1600 PFU/mL) resulting in final sera dilution ratios of 1:32, 1:64,  
556 and 1:128. Following incubation at RT for 1 h, 400  $\mu$ L PBS was added to each sample and the  
557 mixture was subsequently used to infect VeroE6 cells. After 1.5 h of incubation at RT,  
558 inoculum was removed and the cells were overlaid with 0.6% Oxoid-agar in DMEM, 20 mM  
559 HEPES (pH 7.4), 0.1% NaHCO<sub>3</sub>, 1% BSA and 0.01% DEAE-Dextran. Cells were fixed 48h  
560 post-infection (4% formaldehyde for 30 minutes). Upon removal of the agar overlay, plaque  
561 neutralization was visualized using 1% crystal violet. PFU were counted manually. Plaques  
562 counted for serum-treated wells were compared to the average number of plaques in the  
563 untreated negative controls, which were set to 100%.

564

#### 565 **Statistical analyses**



566 Statistical analyses were performed using linear statistical models. i.e. the two-group  
567 comparisons were made based on the t-statistic of the estimated effects. Differences over  
568 more than two groups were tested by Analysis of Variance (ANOVA) and multiple testing for  
569 subsequent two-group comparisons was then considered by performing Games-Howell post-  
570 hoc tests. For the time course data, patient differences were treated as random effects in a  
571 linear mixed effects model with time and clinical course (severe vs. critical) as fixed main and  
572 interaction effects. All analyses were performed at the log<sub>2</sub> scale. Assumptions about variance  
573 heterogeneity and normal distribution were checked by visual inspection of diagnostic plots.

574

### 575 **Ethics**

576 The protocol of this study conforms to the ethical guidelines of the 1975 Declaration of  
577 Helsinki and was approved by the institutional ethical committee of the University of Freiburg  
578 (EK 153/20). Written informed consent was obtained from participants and the study was  
579 conducted according to federal guidelines, local ethics committee regulations (Albert-  
580 Ludwigs-Universität, Freiburg, Germany: No. F-2020-09-03-160428 and no. 322/20)

581



582 **Figure Legends**

583

584 **Figure 1**

585 **IgG responses against different SARS-CoV-2 proteins across severe and critical clinical**  
586 **course of disease.**

587 IgG antibody levels were analyzed in longitudinal serum samples from hospitalized SARS-  
588 CoV-2 infected individuals. 27 patients were categorized as critically diseased when in need  
589 of invasive mechanical ventilation (red symbols) compared to 14 severely diseased patients  
590 who did not require invasive ventilation (blue symbols). (A) IgG response against SARS-  
591 CoV-2 S1 –protein and (B) SARS-CoV-2 N-protein as determined by commercial ELISA  
592 assays. Dotted lines represent cut-off values for commercial S1- and N- specific ELISA  
593 assays. Each dot represents the mean value obtained by the analysis of all samples which were  
594 available at the indicated time points following symptom onset. Solid black lines indicate the  
595 median. (C) Serum neutralization capacity against SARS-CoV-2 measured by a plaque  
596 reduction assay. Sera were considered neutralizing upon 50% plaque reduction (dotted line) at  
597 a 1:64 dilution. Solid black lines indicate the median. Significant differences were tested  
598 using a linear mixed effects model (\*\*\*,  $p < 0.001$ ; \*,  $p < 0.05$ ).

599

600 **Figure 1-figure supplement 1**

601 **SARS-CoV-2 specific IgG levels in seronegative patients and according to disease**  
602 **outcome.**

603 A) S1- and B) N-specific IgG levels in 30 healthy donors. Solid black lines indicate the  
604 median. C) Cumulative S1-, D) N- and E) RBD-specific IgG levels measured 13-25 days after  
605 symptom onset in deceased (black symbols) and not deceased COVID-19 patients (blue  
606 symbols). Solid black lines indicate the median.

607

608 **Figure 1-figure supplement 2**

609 **Longitudinal changes in anti- SARS-CoV-2 IgG titers in severely and critically diseased**  
610 **patients.**

611 Serial serum samples were collected from hospitalized COVID-19 patients and used for  
612 SARS-CoV-2–specific IgG measurement. IgG responses against SARS-CoV-2 S1- and N-  
613 protein in (A, C) critically (red symbols) and (B, D) severely (blue symbols) diseased patients.  
614 Dotted lines represent cut-off values for commercial S1- and N- specific ELISA assays. Each  
615 symbol represents the mean value of all samples which were available for each patient at the

616 indicated time range after symptom onset. There are no significant t-tests (i.e.  $p > 0.05$  for all  
617 comparisons).

618

## 619 **Figure 2**

### 620 **CD16 activation by SARS-CoV-2 - specific IgG is enhanced in critically diseased** 621 **patients.**

622 Fc $\gamma$ RIII activation by SARS-CoV-2-specific IgG on BW5147 reporter cells in serum samples  
623 obtained 13-25 days following symptom onset from 23 critically (red symbols) and 14  
624 severely (blue symbols) diseased patients. Between 2 to 8 samples/patient were analyzed  
625 depending on the availability of sample material. Sera from 29 non-hospitalized patients with  
626 mild SARS-CoV-2 infection (grey symbols) and 30 healthy donors (open circles) served as  
627 reference. Each symbol represents the mean value of all available samples per patient. (A, B,  
628 C) ELISA levels for S1- N- and RBD-specific IgG. Dotted lines represent cut-off values for  
629 commercial S1-, N- and RBD - specific ELISA assays. Solid black lines indicate the mean.  
630 (D, E, F) Fc $\gamma$ RIII activation by S-, N- and RBD-specific IgG expressed as log<sub>2</sub> fold change  
631 relative to negative control. Solid black lines indicate the mean. (G, H, I) Fc $\gamma$ RIII activation,  
632 expressed as log<sub>2</sub> values relative to SARS-CoV-2-specific IgG titers. Solid black lines indicate  
633 the mean. Significant differences over all three groups were tested by ANOVA and pairwise  
634 group comparison was made by Games-Howell post-hoc tests (\*\*\*,  $p < 0.001$ ; \*\*,  $p < 0.01$ ; \*,  
635  $p < 0.05$ ).

636

## 637 **Figure 2-figure supplement 1**

638 **Cell-based reporter assay measuring CD16 activation in response to immobilized IgG**  
639 **and sICs.** BW5147 reporter cells expressing chimeric human Fc $\gamma$ RIII secrete IL-2 in response  
640 to Fc $\gamma$ R activation by A) clustered viral specific IgG binding solid-phase antigen or B) soluble  
641 ICs. Solubility of sICs is achieved by pre-blocking an ELISA plate with PBS supplemented  
642 with 10% FCS as previously described<sup>17</sup>.

643

## 644 **Figure 2-figure supplement 2**

### 645 **Dose dependent CD16 activation by SARS-CoV-2 specific IgG.**

646 CD16 activation by A) S- , B) N- and C) RBD-specific IgG in 9 representatively selected  
647 serum samples and one SARS-CoV-2 negative serum (dark blue bars). Sera were serially  
648 diluted at 1:20, 1:100, 1:500 and 1:2500. Fc $\gamma$ RIII activation initiates IL-2 secretion by  
649 reporter cells, which is subsequently measured via ELISA (OD 450 nm). Based on this

650 empirical pretesting all sera were thereafter tested at 1:100 and 1:500 dilutions to reach an  
651 optimal dynamic range of response. The OD values obtained by the 1:500 dilutions were used  
652 for subsequent data analysis.

653

### 654 **Figure 2-figure supplement 3**

#### 655 **Reproducibility of CD16 activation measurements by SARS-CoV-2 specific IgG.**

656 Selected sera which were available in sufficient amount from patients with critical (red  
657 symbols) or severe (blue symbols) SARS-CoV-2 infection were tested in two independent  
658 experiments to show reproducibility and consistency of results. CD16 activation by S-, N- and  
659 RBD specific IgG is shown. Statistical tests using a Kolmogorov-Smirnov test indicate no  
660 significant differences.

661

### 662 **Figure 2-figure supplement 4**

#### 663 **Correlation of CD16 activation by virus specific IgG and ELISA levels.**

664 Pearson's correlation coefficient was used to assess the relationship between virus-specific  
665 IgG levels and their capability to trigger CD16 activation on BW5147 reporter cells in 22  
666 paired samples from patients with critical disease (red symbols), 14 paired samples from  
667 patients with severe disease (blue symbols) and 28 samples from patients with mild disease  
668 (grey symbols). Each dot represents the mean value obtained by the analysis of all samples  
669 available at the indicated time points. (A-C) anti-S IgG, (D-F) anti-N IgG and anti-RBD-IgG  
670 (E-I).

671

### 672 **Figure 3**

#### 673 **Anti SARS-CoV-2 IgG Fc core fucosylation in critical and severe COVID-19 cases.**

674 IgG-Fc core fucosylation levels of SARS-CoV-2 -specific IgG in critically (red bars) and  
675 severely (blue bars) diseased COVID-19 patients. Analysis was carried out on a pool of 5  
676 different sera. Measured OD values for fucosylation of the generated eluates were normalized  
677 to their respective IgG titers determined by antigen-specific S1 and N ELISA. A) S-IgG-Fc-  
678 fucosylation and B) N-IgG-Fc-fucosylation in critically and severely diseased patients  
679 characterized by either high (red) or low (patterned) CD16-activation levels in the FcγR  
680 activation reporter assay. The mean and standard deviation (SD) of at least three independent  
681 experiments is depicted. Statistical tests using a two-factorial linear model indicate three  
682 significant differences between the low and high categories (\*\*\*,  $p < 0.001$ ; \*\*,  $p < 0.01$ ; \*,  
683  $p < 0.05$ ; ns = not significant).

684 **Figure 4**

685 **Severe COVID-19 disease coincides with high CD16 activation by sICs.**

686 Serial serum samples obtained 13-25 days after onset of symptoms were analyzed in a cell-  
687 based reporter assay which is sensitive to sIC amount and size<sup>16</sup>. FcγR activation is shown as  
688 log<sub>2</sub> fold change relative to negative control. Each symbol represents the mean value obtained  
689 by the analysis of all samples available in the indicated time range for each individual patient.  
690 A) Analysis of CD16 activation by sICs in SARS-CoV-2-infected patients compared to  
691 healthy blood donors B) Levels of IC-mediated CD16 activation across severe, critical and  
692 mild clinical courses of COVID-19 disease, in healthy donors (HD) and in non-COVID-19-  
693 patients who developed acute respiratory distress syndrome (ARDS). Solid black lines  
694 indicate the mean. Two-group comparisons with the linear model indicate significant  
695 differences between critical cases and all other groups, as well as between severe cases and all  
696 other groups (\*\*\*, p<0.001; \*\*, p<0.01). No significant differences (p>0.05) have been found  
697 for the comparisons mild vs. healthy and for HD vs. ARDS. C) Kinetics of IC-mediated CD16  
698 activation in critically and severely diseased patients. Solid black lines indicate the median.  
699 The mixed effects model indicates two time points with significant differences (\*\*, p<0.01; \*,  
700 p<0.05).

701

702 **Figure 4-figure supplement 1**

703 **CD16 activation by sICs in non-COVID-19 patients with ARDS.**

704 Serum samples from 47 patients with ARDS in response to infections of different etiology  
705 were analyzed in a cell-based reporter assay which is sensitive to sIC amount and size<sup>16</sup>. FcγR  
706 activation is shown as log<sub>2</sub> fold change relative to negative control. Each symbol represents  
707 one sample from one patient. CMV: Cytomegalovirus reactivation under immunosuppression;  
708 HIV: HIV infection; TBC: Mycobacterium tuberculosis infection; Influenza: influenza virus  
709 infection; TX: solid organ transplantation. Solid black lines indicate the median.

710

711 **Figure 4-figure supplement 2**

712 **PEG precipitation eliminates sIC-mediated CD16 activation.**

713 Pools of 8 sera were incubated with equal volumes of PEG8000 to reach the indicated final  
714 PEG concentrations. A) CD16 activation after PEG-precipitation in the pool supernatant,  
715 showing either high (sICs+) or no (sICs-) CD16 activation. Sera from healthy donors (HD)  
716 were included as a negative control. Activation levels are expressed as IL-2 levels (OD 450  
717 nm) released by reporter cells. The mean and SD of two independent experiments is depicted.

718 B) Anti SARS-CoV-2 IgG levels against S1 (left panel) or N (right panel) IgG following PEG  
719 precipitation. The mean and SD of two independent experiments (sIC+/sIC-) is depicted.

720

### 721 **Figure 4-figure supplement 3**

722 **Individual CD16 activation by sICs and anti-S1 ELISA IgG kinetics post symptoms**  
723 **onset.**

724 Individual sera for either critically or severely diseased patients were analyzed in order to  
725 detect anti S1-IgG antibodies (top panel) via Euroimmune ELISA [AU] and CD16 activation  
726 by soluble immune complexes (lower panel, relative CD16 activation depicted as fold  
727 increase to the negative control) over time (1-40 days post symptom onset). White panel: not  
728 tested.

729

### 730 **Figure 4-figure supplement 4**

731 **Benzonase treatment of sIC-reactive sera does not abolish CD16 activation.**

732 Left panel: sIC-mediated CD16 reactivity expressed as  $\log_2$  fold increase to the negative  
733 control, in serum of six individual patients before and after treatment with 250 Units of  
734 Benzonase Nuclease. Right panel: As positive control, 3  $\mu\text{g}$  plasmid DNA was digested. M:  
735 1kb DNA ladder, Lane 1: benzonase digestion in the presence of human serum, lane 2:  
736 plasmid DNA w/o benzonase in the presence of human serum, lane 3: benzonase digestion in  
737 medium only and lane 4: plasmid DNA w/o benzonase in medium only.

738

739

### 740 **Figure 5**

741 **Summary of antibody features from SARS-CoV-2-infected patients with critical and**  
742 **severe disease.**

743 Relative multivariate antibody features illustrated as radar chart in critically (red) or severely  
744 (blue) diseased COVID-19 patients normalized to the corresponding features of patients with  
745 mild infection (grey). Each spoke represents one of the following variables: ELISA (S1-IgG,  
746 N-IgG,) and CD16 activation (S-IgG, N-IgG, sICs). Arithmetic mean values of  $\log_2$  values  
747 were calculated for each group (days 13-25 post symptom onset) respectively. The fold  
748 change compared to mildly diseased patients is shown.

749

750

751

752 **Table 1**

753 **Clinical characteristics of the hospitalized SARS-CoV-2 patients.**

754 Patients were categorized as either severely (hospitalized, requiring O<sub>2</sub> supplementation,  
755 n=14) or critically diseased (hospitalized and in need of invasive mechanical ventilation,  
756 n=27). Diagnostic markers are depicted as mean and SD (in brackets) of all analyzed  
757 laboratory parameters obtained 13-25 days post symptom onset. Percentage [%] is indicated.

## 758 References

759

- 760 1 Zhu, N. *et al.* A Novel Coronavirus from Patients with Pneumonia in China, 2019. *N Engl J*  
761 *Med* **382**, 727-733, doi:10.1056/NEJMoa2001017 (2020).
- 762 2 Dong, E., Du, H. & Gardner, L. An interactive web-based dashboard to track COVID-19 in real  
763 time. *Lancet Infect Dis* **20**, 533-534, doi:10.1016/S1473-3099(20)30120-1 (2020).
- 764 3 Chen, G. *et al.* Clinical and immunological features of severe and moderate coronavirus  
765 disease 2019. *J Clin Invest* **130**, 2620-2629, doi:10.1172/JCI137244 (2020).
- 766 4 Felsenstein, S., Herbert, J. A., McNamara, P. S. & Hedrich, C. M. COVID-19: Immunology and  
767 treatment options. *Clin Immunol* **215**, 108448, doi:10.1016/j.clim.2020.108448 (2020).
- 768 5 Magleby, R. *et al.* Impact of SARS-CoV-2 Viral Load on Risk of Intubation and Mortality  
769 Among Hospitalized Patients with Coronavirus Disease 2019. *Clin Infect Dis*,  
770 doi:10.1093/cid/ciaa851 (2020).
- 771 6 Ruan, Q., Yang, K., Wang, W., Jiang, L. & Song, J. Correction to: Clinical predictors of mortality  
772 due to COVID-19 based on an analysis of data of 150 patients from Wuhan, China. *Intensive*  
773 *Care Med* **46**, 1294-1297, doi:10.1007/s00134-020-06028-z (2020).
- 774 7 Zhou, F. *et al.* Clinical course and risk factors for mortality of adult inpatients with COVID-19  
775 in Wuhan, China: a retrospective cohort study. *Lancet* **395**, 1054-1062, doi:10.1016/S0140-  
776 6736(20)30566-3 (2020).
- 777 8 Yang, X. *et al.* Clinical course and outcomes of critically ill patients with SARS-CoV-2  
778 pneumonia in Wuhan, China: a single-centered, retrospective, observational study. *Lancet*  
779 *Respir Med* **8**, 475-481, doi:10.1016/S2213-2600(20)30079-5 (2020).
- 780 9 Zhou, Y. *et al.* Pathogenic T-cells and inflammatory monocytes incite inflammatory storms in  
781 severe COVID-19 patients. *National Science Review* **7**, 998-1002, doi:10.1093/nsr/nwaa041  
782 (2020).
- 783 10 Long, Q. X. *et al.* Antibody responses to SARS-CoV-2 in patients with COVID-19. *Nat Med* **26**,  
784 845-848, doi:10.1038/s41591-020-0897-1 (2020).
- 785 11 Zhang, J. M. & An, J. Cytokines, inflammation, and pain. *Int Anesthesiol Clin* **45**, 27-37,  
786 doi:10.1097/AIA.0b013e318034194e (2007).
- 787 12 Vogelpoel, L. T., Baeten, D. L., de Jong, E. C. & den Dunnen, J. Control of cytokine production  
788 by human fc gamma receptors: implications for pathogen defense and autoimmunity. *Front*  
789 *Immunol* **6**, 79, doi:10.3389/fimmu.2015.00079 (2015).
- 790 13 Bruhns, P. & Jonsson, F. Mouse and human FcR effector functions. *Immunol Rev* **268**, 25-51,  
791 doi:10.1111/imr.12350 (2015).
- 792 14 Zubler, R. H. *et al.* Circulating and intra-articular immune complexes in patients with  
793 rheumatoid arthritis. Correlation of 125I-Clq binding activity with clinical and biological  
794 features of the disease. *J Clin Invest* **57**, 1308-1319, doi:10.1172/JCI108399 (1976).
- 795 15 Levinsky, R. J. Role of circulating soluble immune complexes in disease. *Arch Dis Child* **53**, 96-  
796 99, doi:10.1136/adc.53.2.96 (1978).
- 797 16 Levinsky, R. J., Cameron, J. S. & Soothill, J. F. Serum immune complexes and disease activity  
798 in lupus nephritis. *Lancet* **1**, 564-567, doi:10.1016/s0140-6736(77)91998-5 (1977).
- 799 17 Chen, H. *et al.* FcγR responses to soluble immune complexes are governed by solubility and  
800 size. *bioRxiv*, 2020.2011.2011.378232, doi:10.1101/2020.11.11.378232 (2021).
- 801 18 Wang, T. T. & Ravetch, J. V. Immune complexes: not just an innocent bystander in chronic  
802 viral infection. *Immunity* **42**, 213-215, doi:10.1016/j.immuni.2015.01.022 (2015).
- 803 19 Carreno, L. J., Pacheco, R., Gutierrez, M. A., Jacobelli, S. & Kalergis, A. M. Disease activity in  
804 systemic lupus erythematosus is associated with an altered expression of low-affinity Fc  
805 gamma receptors and costimulatory molecules on dendritic cells. *Immunology* **128**, 334-341,  
806 doi:10.1111/j.1365-2567.2009.03138.x (2009).
- 807 20 Faik, I. *et al.* Pyruvate Kinase and Fcγ Receptor Gene Copy Numbers Associated With  
808 Malaria Phenotypes. *J Infect Dis* **216**, 276-282, doi:10.1093/infdis/jix284 (2017).



- 809 21 Xu, Z. *et al.* Pathological findings of COVID-19 associated with acute respiratory distress  
810 syndrome. *Lancet Respir Med* **8**, 420-422, doi:10.1016/S2213-2600(20)30076-X (2020).
- 811 22 Channappanavar, R. & Perlman, S. Pathogenic human coronavirus infections: causes and  
812 consequences of cytokine storm and immunopathology. *Seminars in Immunopathology* **39**,  
813 529-539, doi:10.1007/s00281-017-0629-x (2017).
- 814 23 Smits, S. L. *et al.* Exacerbated innate host response to SARS-CoV in aged non-human  
815 primates. *PLoS Pathog* **6**, e1000756, doi:10.1371/journal.ppat.1000756 (2010).
- 816 24 Rockx, B. *et al.* Early upregulation of acute respiratory distress syndrome-associated  
817 cytokines promotes lethal disease in an aged-mouse model of severe acute respiratory  
818 syndrome coronavirus infection. *J Virol* **83**, 7062-7074, doi:10.1128/JVI.00127-09 (2009).
- 819 25 Hoepel, W. *et al.* High titers and low fucosylation of early human anti-SARS-CoV-2 IgG  
820 promote inflammation by alveolar macrophages. *Sci Transl Med* **13**,  
821 doi:10.1126/scitranslmed.abf8654 (2021).
- 822 26 Zohar, T. & Alter, G. Dissecting antibody-mediated protection against SARS-CoV-2. *Nat Rev*  
823 *Immunol* **20**, 392-394, doi:10.1038/s41577-020-0359-5 (2020).
- 824 27 Lu, L. L., Suscovich, T. J., Fortune, S. M. & Alter, G. Beyond binding: antibody effector  
825 functions in infectious diseases. *Nat Rev Immunol* **18**, 46-61, doi:10.1038/nri.2017.106  
826 (2018).
- 827 28 Corrales-Aguilar, E. *et al.* A novel assay for detecting virus-specific antibodies triggering  
828 activation of Fc gamma receptors. *J Immunol Methods* **387**, 21-35,  
829 doi:10.1016/j.jim.2012.09.006 (2013).
- 830 29 Chakraborty, S. *et al.* Proinflammatory IgG Fc structures in patients with severe COVID-19.  
831 *Nat Immunol* **22**, 67-73, doi:10.1038/s41590-020-00828-7 (2021).
- 832 30 High titers and low fucosylation of early human anti-SARS-CoV-2 IgG promote inflammation  
833 by alveolar macrophages. *Sci Transl Med*, doi:10.1126/scitranslmed.abf8654 (2021).
- 834 31 Larsen, M. D. *et al.* Afucosylated IgG characterizes enveloped viral responses and correlates  
835 with COVID-19 severity. *Science* **371**, doi:10.1126/science.abc8378 (2021).
- 836 32 Li, T. *et al.* Modulating IgG effector function by Fc glycan engineering. *Proceedings of the*  
837 *National Academy of Sciences of the United States of America* **114**, 3485-3490,  
838 doi:10.1073/pnas.1702173114 (2017).
- 839 33 Roncati, L. *et al.* Type 3 hypersensitivity in COVID-19 vasculitis. *Clinical Immunology* **217**,  
840 doi:ARTN 108487  
841 10.1016/j.clim.2020.108487 (2020).
- 842 34 Roe, K. High COVID-19 virus replication rates, the creation of antigen-antibody immune  
843 complexes and indirect haemagglutination resulting in thrombosis. *Transbound Emerg Dis*  
844 **67**, 1418-1421, doi:10.1111/tbed.13634 (2020).
- 845 35 Zhang, Y. *et al.* Coagulopathy and Antiphospholipid Antibodies in Patients with Covid-19. *N*  
846 *Engl J Med* **382**, e38, doi:10.1056/NEJMc2007575 (2020).
- 847 36 Creighton, W. D., Lambert, P. H. & Miescher, P. A. Detection of antibodies and soluble  
848 antigen-antibody complexes by precipitation with polyethylene glycol. *J Immunol* **111**, 1219-  
849 1227 (1973).
- 850 37 Veras, F. P. *et al.* SARS-CoV-2-triggered neutrophil extracellular traps mediate COVID-19  
851 pathology. *J Exp Med* **217**, doi:10.1084/jem.20201129 (2020).
- 852 38 Horwitz, J. A. *et al.* Non-neutralizing Antibodies Alter the Course of HIV-1 Infection In Vivo.  
853 *Cell* **170**, 637-648 e610, doi:10.1016/j.cell.2017.06.048 (2017).
- 854 39 Forthal, D. N. & Moog, C. Fc receptor-mediated antiviral antibodies. *Curr Opin HIV AIDS* **4**,  
855 388-393, doi:10.1097/COH.0b013e32832f0a89 (2009).
- 856 40 DiLillo, D. J., Tan, G. S., Palese, P. & Ravetch, J. V. Broadly neutralizing hemagglutinin stalk-  
857 specific antibodies require FcγR interactions for protection against influenza virus in  
858 vivo. *Nat Med* **20**, 143-151, doi:10.1038/nm.3443 (2014).
- 859 41 Hessell, A. J. *et al.* Fc receptor but not complement binding is important in antibody  
860 protection against HIV. *Nature* **449**, 101-104, doi:10.1038/nature06106 (2007).

- 861 42 Li, K. *et al.* Dynamic changes in anti-SARS-CoV-2 antibodies during SARS-CoV-2 infection and  
862 recovery from COVID-19. *Nature communications* **11**, 6044, doi:10.1038/s41467-020-19943-y  
863 (2020).
- 864 43 Ogata, A. F. *et al.* Circulating SARS-CoV-2 Vaccine Antigen Detected in the Plasma of mRNA-  
865 1273 Vaccine Recipients. *Clin Infect Dis*, doi:10.1093/cid/ciab465 (2021).
- 866 44 Zhang, L. *et al.* SARS-CoV-2 spike-protein D614G mutation increases virion spike density and  
867 infectivity. *Nature communications* **11**, 6013, doi:10.1038/s41467-020-19808-4 (2020).
- 868 45 Letarov, A. V., Babenko, V. V. & Kulikov, E. E. Free SARS-CoV-2 Spike Protein S1 Particles May  
869 Play a Role in the Pathogenesis of COVID-19 Infection. *Biochemistry (Mosc)* **86**, 257-261,  
870 doi:10.1134/S0006297921030032 (2021).
- 871 46 Woodruff, M. C. *et al.* Extrafollicular B cell responses correlate with neutralizing antibodies  
872 and morbidity in COVID-19. *Nat Immunol* **21**, 1506-1516, doi:10.1038/s41590-020-00814-z  
873 (2020).
- 874 47 Wang, E. Y. *et al.* Diverse functional autoantibodies in patients with COVID-19. *Nature*,  
875 doi:10.1038/s41586-021-03631-y (2021).
- 876 48 Zuo, Y. *et al.* Prothrombotic autoantibodies in serum from patients hospitalized with COVID-  
877 19. *Sci Transl Med* **12**, doi:10.1126/scitranslmed.abd3876 (2020).
- 878 49 Chang, S. E. *et al.* New-Onset IgG Autoantibodies in Hospitalized Patients with COVID-19.  
879 *medRxiv*, doi:10.1101/2021.01.27.21250559 (2021).
- 880 50 Bastard, P. *et al.* Autoantibodies against type I IFNs in patients with life-threatening COVID-  
881 19. *Science* **370**, doi:10.1126/science.abd4585 (2020).
- 882 51 Heidelberger, M. & Kendall, F. E. A Quantitative Study of the Precipitin Reaction between  
883 Type Iii Pneumococcus Polysaccharide and Purified Homologous Antibody. *J Exp Med* **50**,  
884 809-823, doi:10.1084/jem.50.6.809 (1929).
- 885 52 Gharebaghi, N., Nejadrahim, R., Mousavi, S. J., Sadat-Ebrahimi, S. R. & Hajizadeh, R. The use  
886 of intravenous immunoglobulin gamma for the treatment of severe coronavirus disease  
887 2019: a randomized placebo-controlled double-blind clinical trial. *BMC Infect Dis* **20**, 786,  
888 doi:10.1186/s12879-020-05507-4 (2020).
- 889 53 Kolb, P. *et al.* Identification and Functional Characterization of a Novel Fc Gamma-Binding  
890 Glycoprotein in Rhesus Cytomegalovirus. *J Virol* **93**, doi:10.1128/JVI.02077-18 (2019).
- 891 54 Amanat, F. *et al.* A serological assay to detect SARS-CoV-2 seroconversion in humans. *Nat*  
892 *Med* **26**, 1033-1036, doi:10.1038/s41591-020-0913-5 (2020).
- 893 55 Pandey, A., Andersen, J. S. & Mann, M. Use of mass spectrometry to study signaling  
894 pathways. *Sci STKE* **2000**, pl1, doi:10.1126/stke.2000.37.pl1 (2000).
- 895 56 Tönshoff, B. *et al.* Prevalence of SARS-CoV-2 Infection in Children and Their Parents in  
896 Southwest Germany. *JAMA Pediatrics* **175**, 586-593, doi:10.1001/jamapediatrics.2021.0001  
897 (2021).
- 898
- 899
- 900

901

902 **Acknowledgements**

903 We thank Sophia Ruben and Torsten Schulz from InVivo Bio Tech Services for preparing  
904 SARS-CoV-2 (S)- and RBD- coated plates and preparing the SARS-CoV-2 IgG ELISA  
905 Reagent Set. We thank Hans-Martin Jäck for providing TRES-1-224.2.19 and TRES-II-480  
906 monoclonal antibodies and Quinnlan David for critically reading the manuscript. We also  
907 thank Andreas Schlosser for validation of our Mass Spectrometry data. This work was  
908 supported by the Bundesministerium fuer Bildung und Forschung (BMBF) through the  
909 Deutsches Zentrum fuer Luft- und Raumfahrt, Germany, (DLR, grant number 01KI2077) and  
910 by the Federal State of Baden-Wuerttemberg, Germany, MWK-Sonderfoerdermaßnahme  
911 COVID-19/AZ.:33-7533.-6-21/7/2 to MS. This work was also supported by an intramural  
912 junior investigator fund of the Faculty of Medicine to PK (Hans A. Krebs - Funding for  
913 Medical Scientists, Faculty of Medicine, University of Freiburg) and “NaFoUniMedCovid19“  
914 (FKZ: 01KX2021 - COVIM to H.H., FKZ 100493916 B-FAST to H.H.) and DFG HE2526/9-  
915 1 to H.H.. A. Lothar is a member of SFB1425, funded by the Deutsche  
916 Forschungsgemeinschaft (DFG, German Research Foundation #422681845). The funders had  
917 no role in the study design, data analysis, data interpretation, and in the writing of this report.  
918 All authors had full access to the data in the study and accept responsibility to submit for  
919 publication.

920

921 **Author contribution:**

922 Conceived and designed the experiments: J.A., A.M-P., S.G., P.K., A.L, V.F., M.S., H.H.

923 Performed the experiments: J.A., N.G., U.S., S.G., K. C., W.B.

924 Analyzed the data: J.A., S.G., P.K., V.F., K.C., A.M-P., W.B., C.K.

925 Contributed/reagent/sample material: A.B.G., D.H., T.W., N.G.M.

926 Writing and original draft preparation: J.A., S.G., P.K., V.F.

927

928 Review and editing: H.H., M.S., K.C.

929 Conceptualization: V.F., H.H.

930

931 **Competing interests:** The authors declare the following competing financial interest(s):

932 InVivo BioTech Services is a biotechnology company producing antibodies and proteins,

933 including SARS-CoV-2 antigens.

934 **Data and materials availability:** All data associated with this study are present in the paper

935 or Supplementary Materials.

936

937 **Figures and Tables**

938

939 **Table 1**

|                                                        | <b>All patients</b><br>n: 41 | <b>%</b> | <b>critical</b><br>n: 27 | <b>%</b> | <b>severe</b><br>n: 14 | <b>%</b> |
|--------------------------------------------------------|------------------------------|----------|--------------------------|----------|------------------------|----------|
| Age [years]                                            | Ø 68<br>(31-90)              | -        | Ø 63<br>(39-79)          | -        | Ø 76<br>(31-90)        | -        |
| Female                                                 | 8                            | 19.5     | 5                        | 18.5     | 3                      | 21.4     |
| Male                                                   | 33                           | 80.5     | 22                       | 81.5     | 11                     | 78.6     |
| <b>Comorbidities</b>                                   |                              |          |                          |          |                        |          |
| Hypertension                                           | 21                           | 51.2     | 12                       | 44.4     | 9                      | 64.3     |
| Cardiovascular disease                                 | 14                           | 34.1     | 5                        | 18.5     | 9                      | 64.3     |
| Pulmonary disease                                      | 6                            | 14.6     | 2                        | 7.4      | 4                      | 28.6     |
| Chronic kidney disease                                 | 6                            | 14.6     | 1                        | 3.7      | 5                      | 35.7     |
| Diabetes                                               | 10                           | 24.4     | 6                        | 22.2     | 4                      | 28.6     |
| Malignancy                                             | 8                            | 19.5     | 4                        | 14.8     | 4                      | 28.6     |
| none                                                   | 6                            | 14.6     | 6                        | 22.2     | 0                      | 0        |
| <b>Diagnostic markers</b>                              |                              |          |                          |          |                        |          |
| Interleukin-6 [pg/ml] Ø                                | 1012.8                       | -        | 1452.1<br>(3774.6)       | -        | 46.1<br>(26.8)         | -        |
| Procalcitonin [ng/ml] Ø                                | 7                            | -        | 9.9<br>(21.9)            | -        | 0.17<br>(0.11)         | -        |
| C- reactive protein [mg/l] Ø                           | 128.1                        | -        | 162.2<br>(75.8)          | -        | 65.3<br>(47.1)         | -        |
| <b>Complications</b>                                   |                              |          |                          |          |                        |          |
| Bacterial superinfection                               | 16                           | 39       | 11                       | 40.7     | 5                      | 35.7     |
| <b>Treatment</b>                                       |                              |          |                          |          |                        |          |
| Hydroxychloroquine, Ritonavir+<br>Lopinavir (Kaletra®) | 24                           | 58.5     | 18                       | 66.7     | 6                      | 42.9     |
| <b>Fatal outcome</b>                                   |                              |          |                          |          |                        |          |
| Total                                                  | 11                           | 26.8     | 10                       | 37       | 1                      | 7.1      |

940

941

942 **Figure 1**

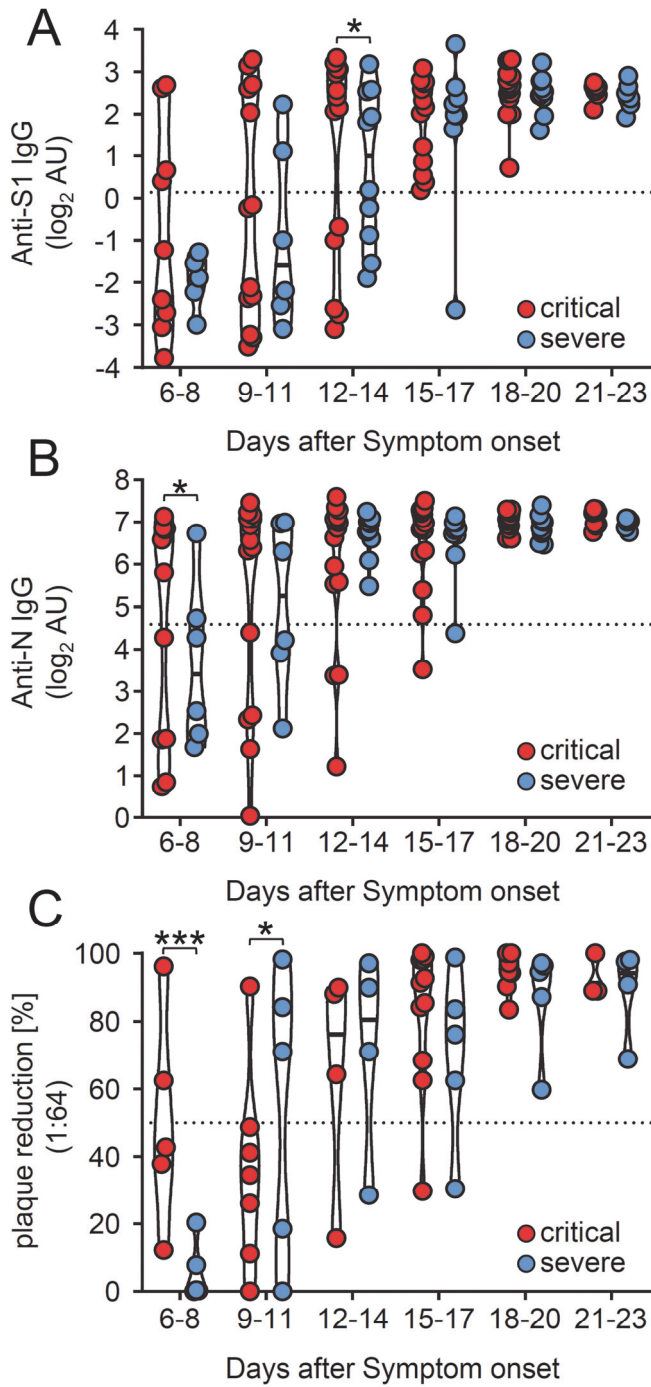

943

944

945

946 **Figure 1 – figure supplement 1**

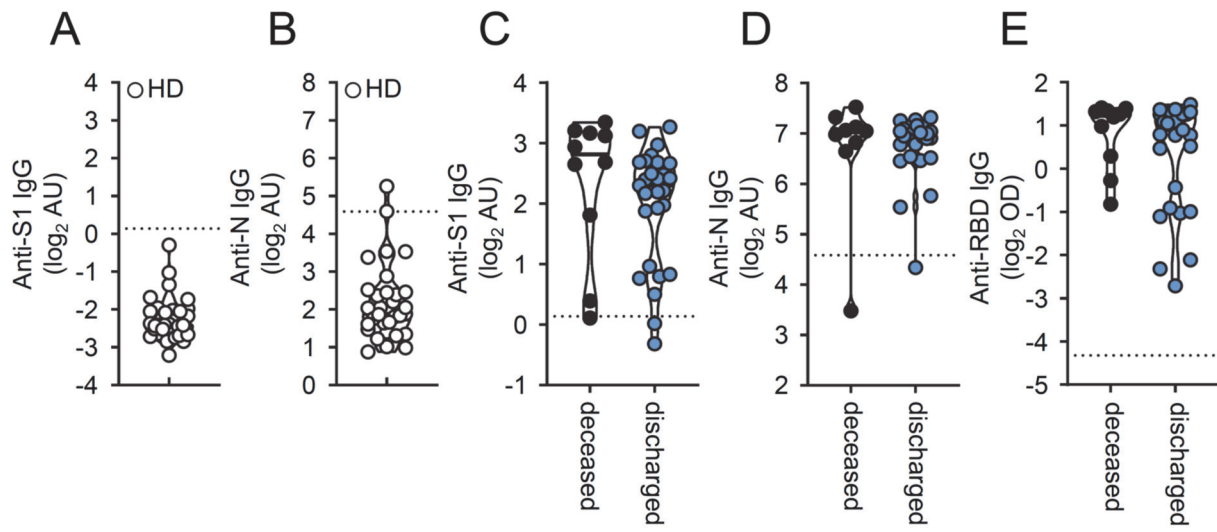

947

948



949 **Figure 1 – figure supplement 2**

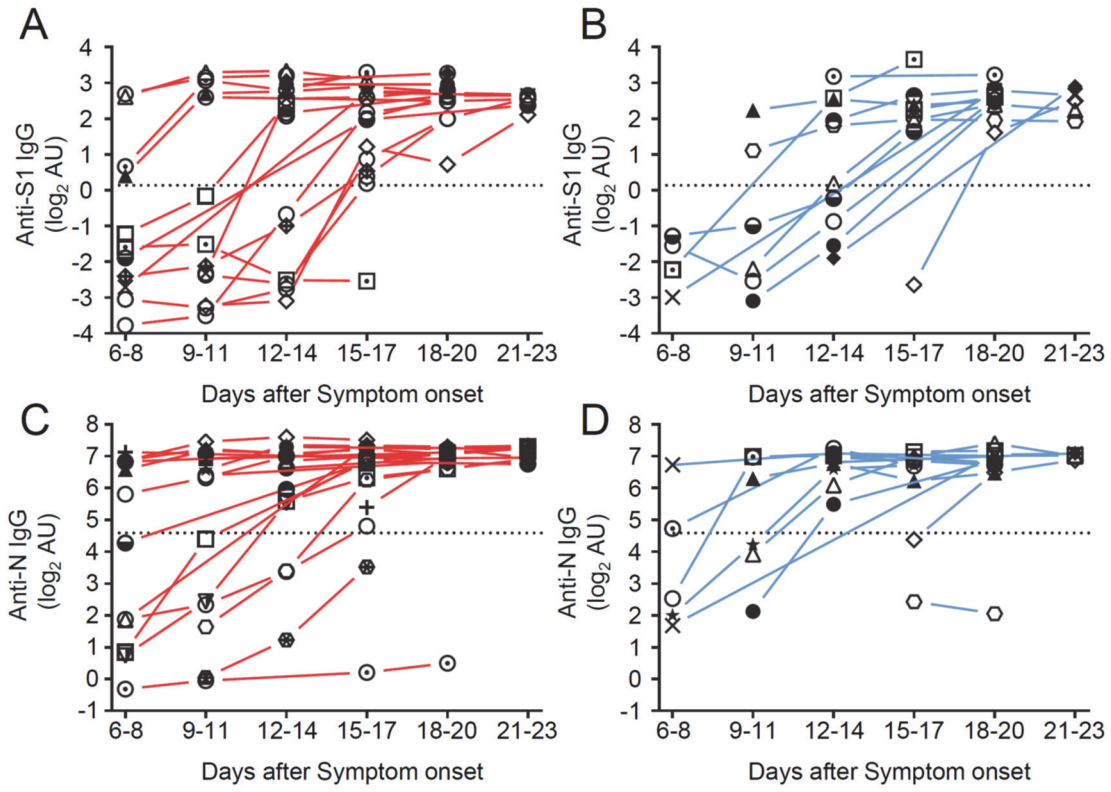

950

951 **Figure 2**

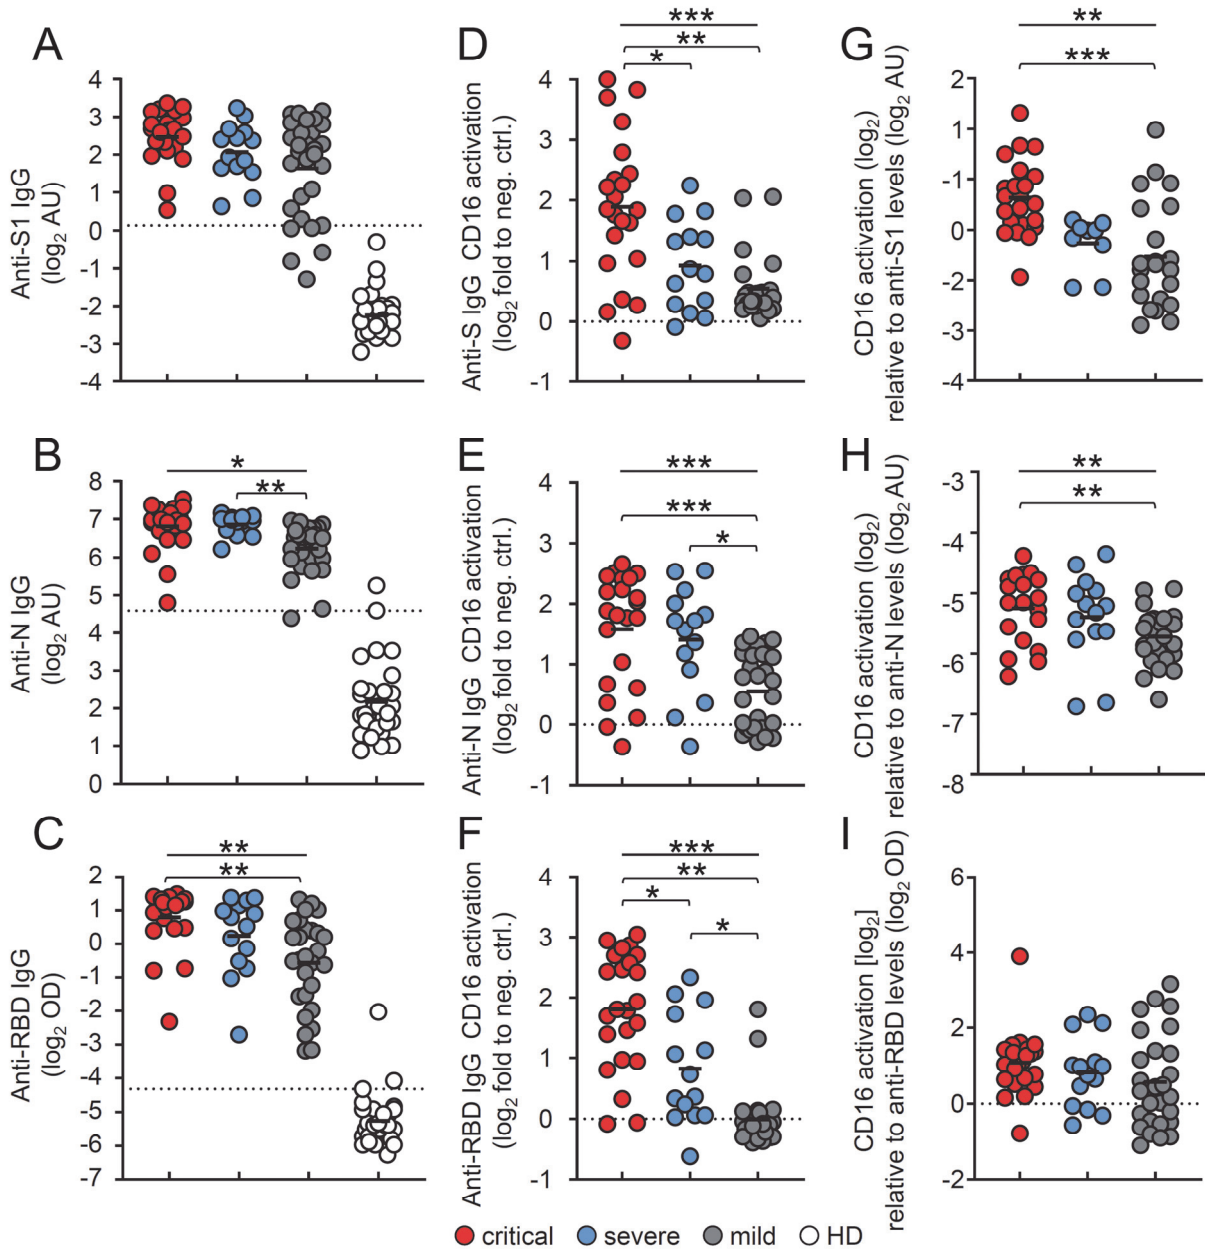

952

953

954 **Figure 2 –figure supplement 1**

955

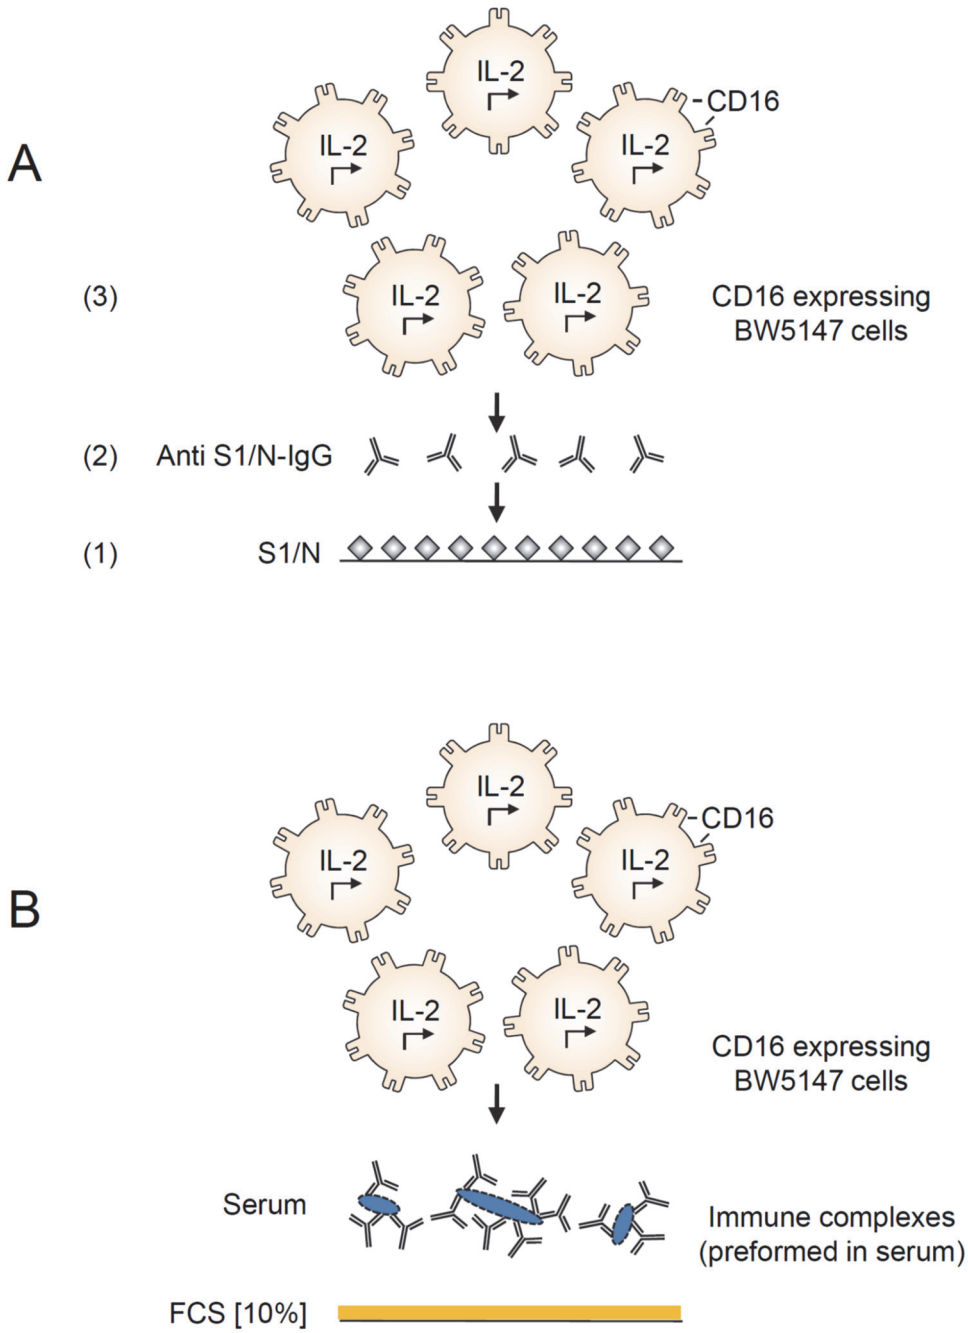

956

957

958 **Figure 2 –figure supplement 2**

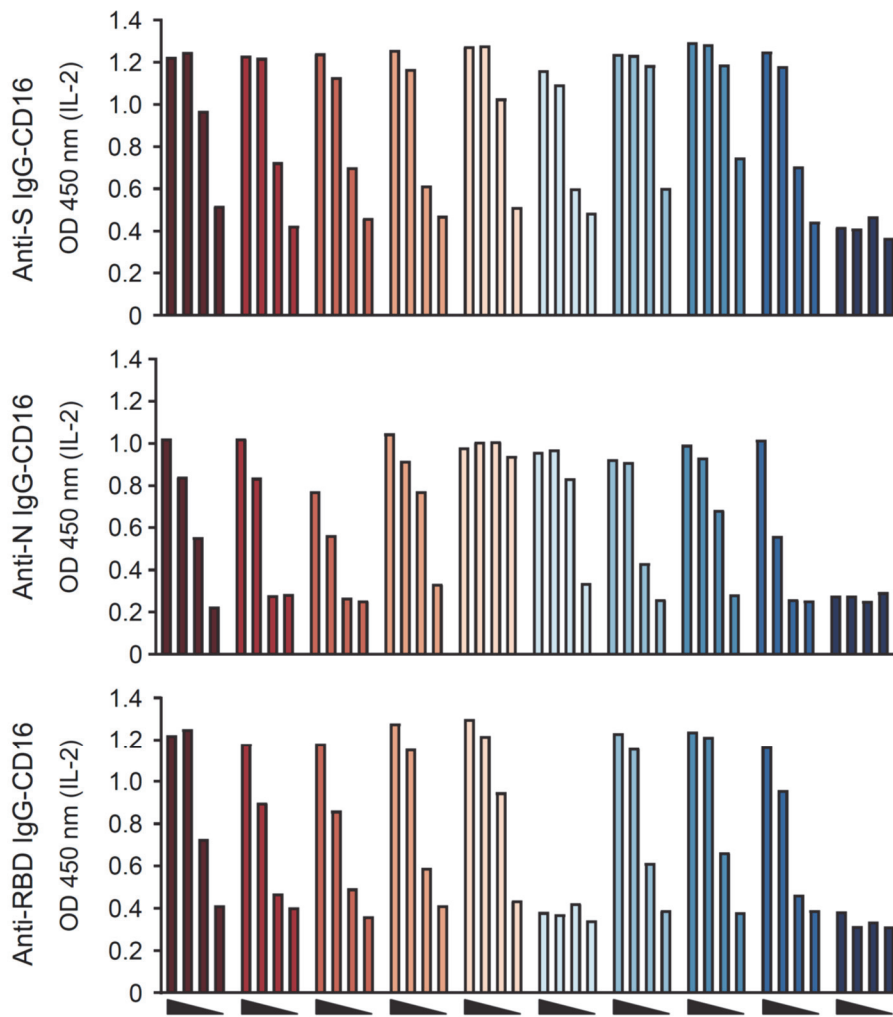

959

960

961 **Figure 2 –figure supplement 3**

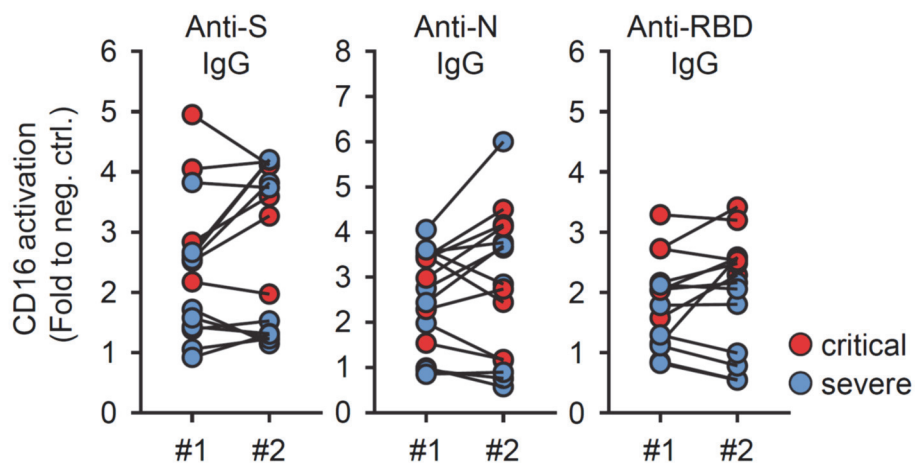

962

963

964 **Figure 2 –figure supplement 4**

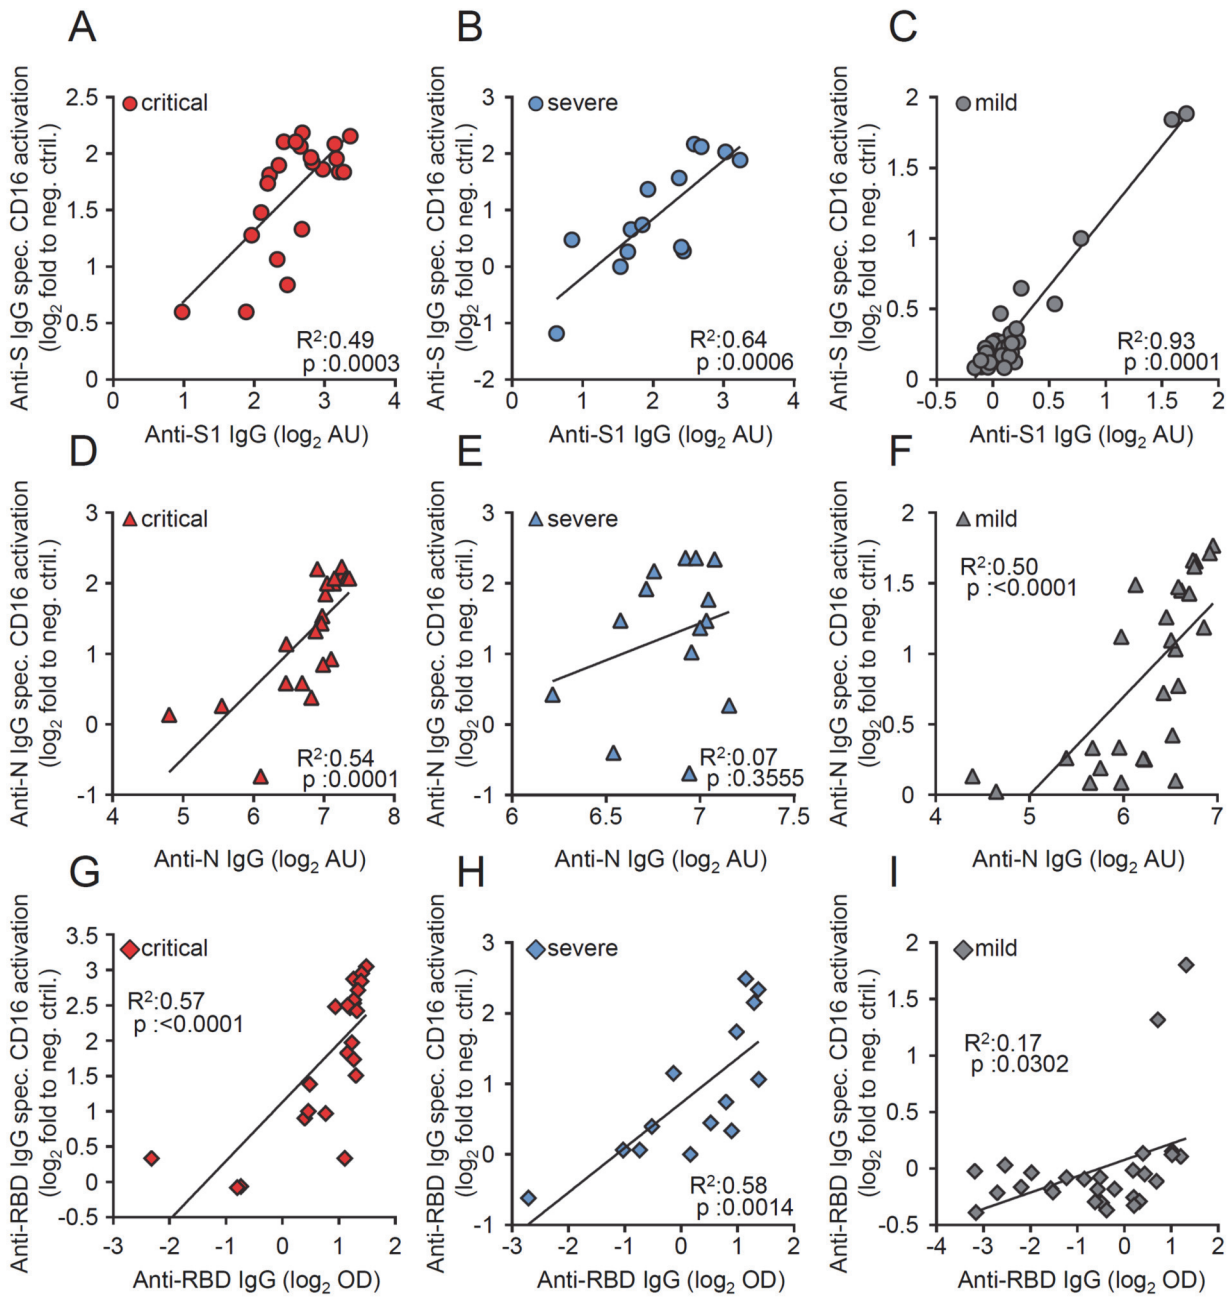

965

966

967 **Figure 3**

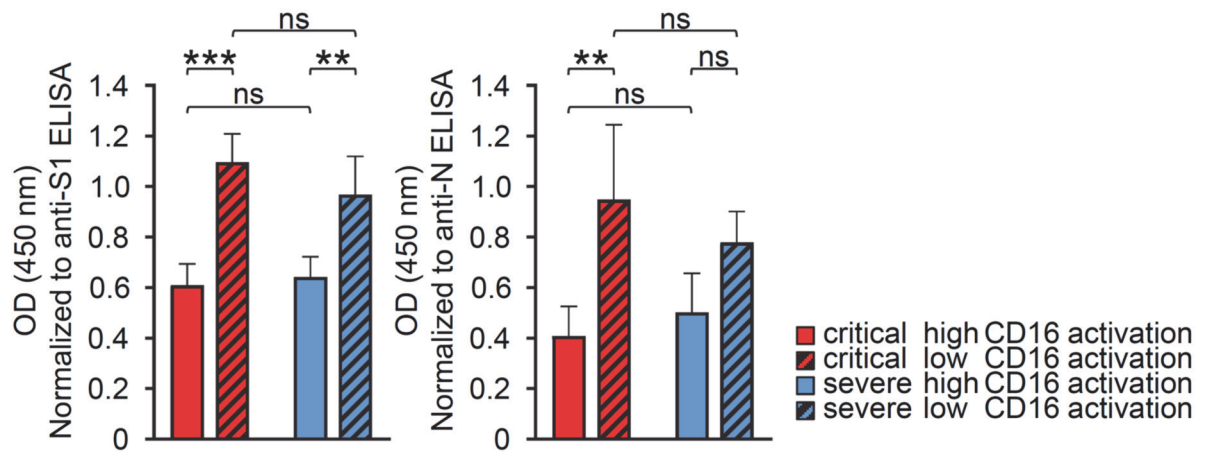

968

969



970 **Figure 4**

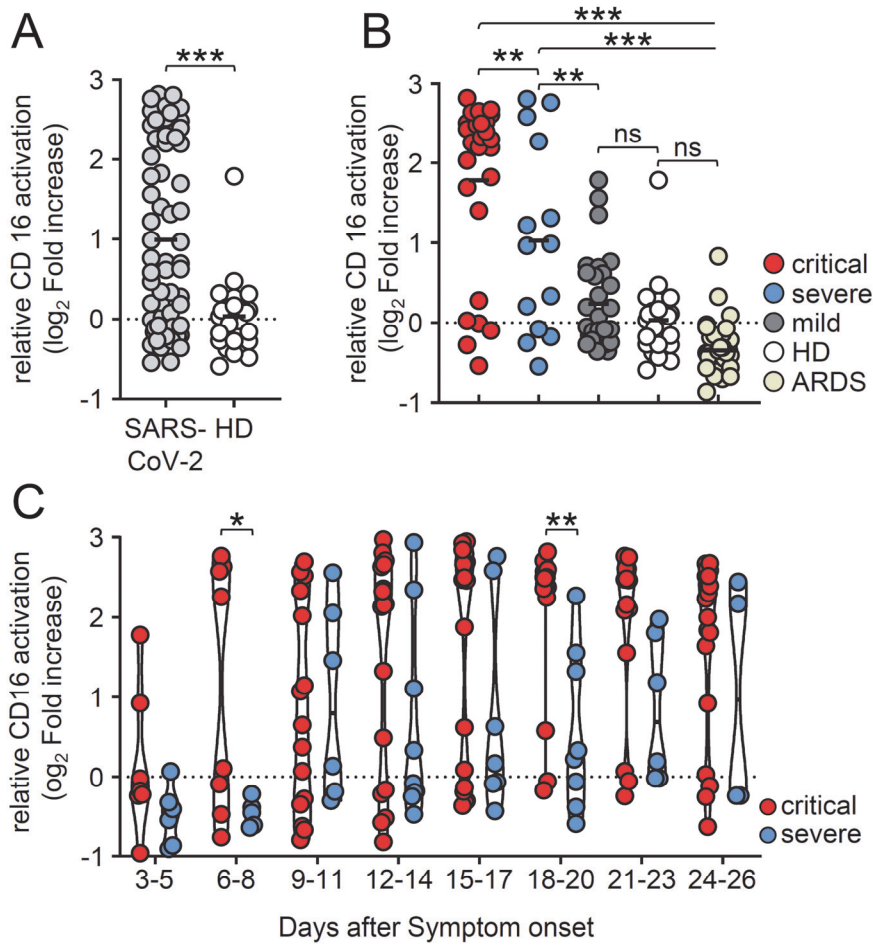

971

972

973 **Figure 4 – figure supplement 1**

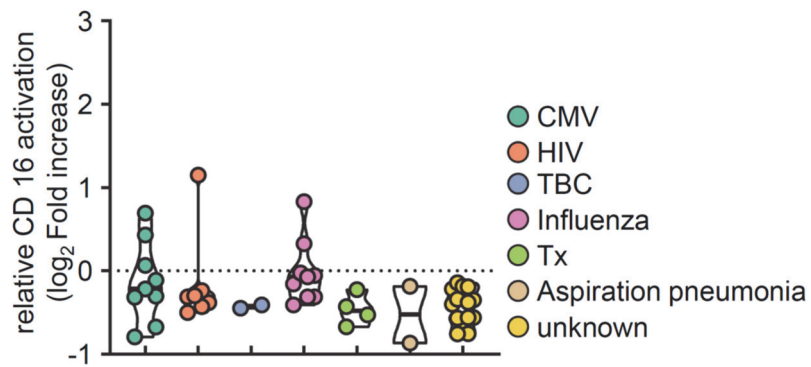

974

975

976 **Figure 4 – figure supplement 2**

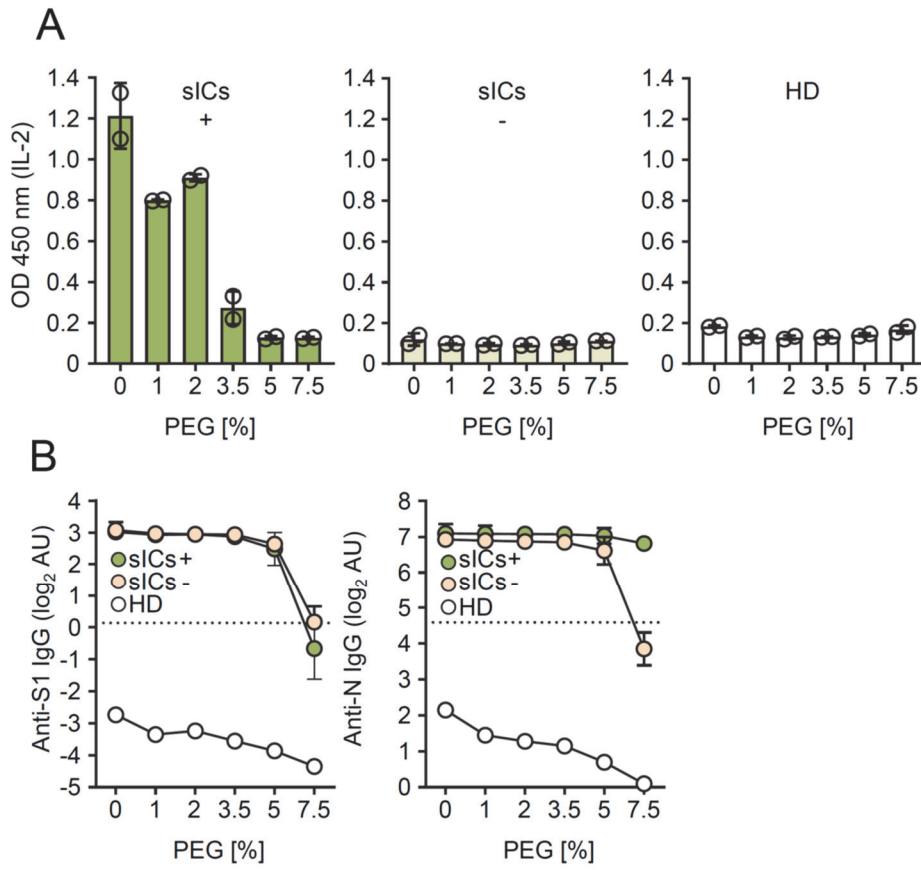

977

978 **Figure 4 – figure supplement 3**

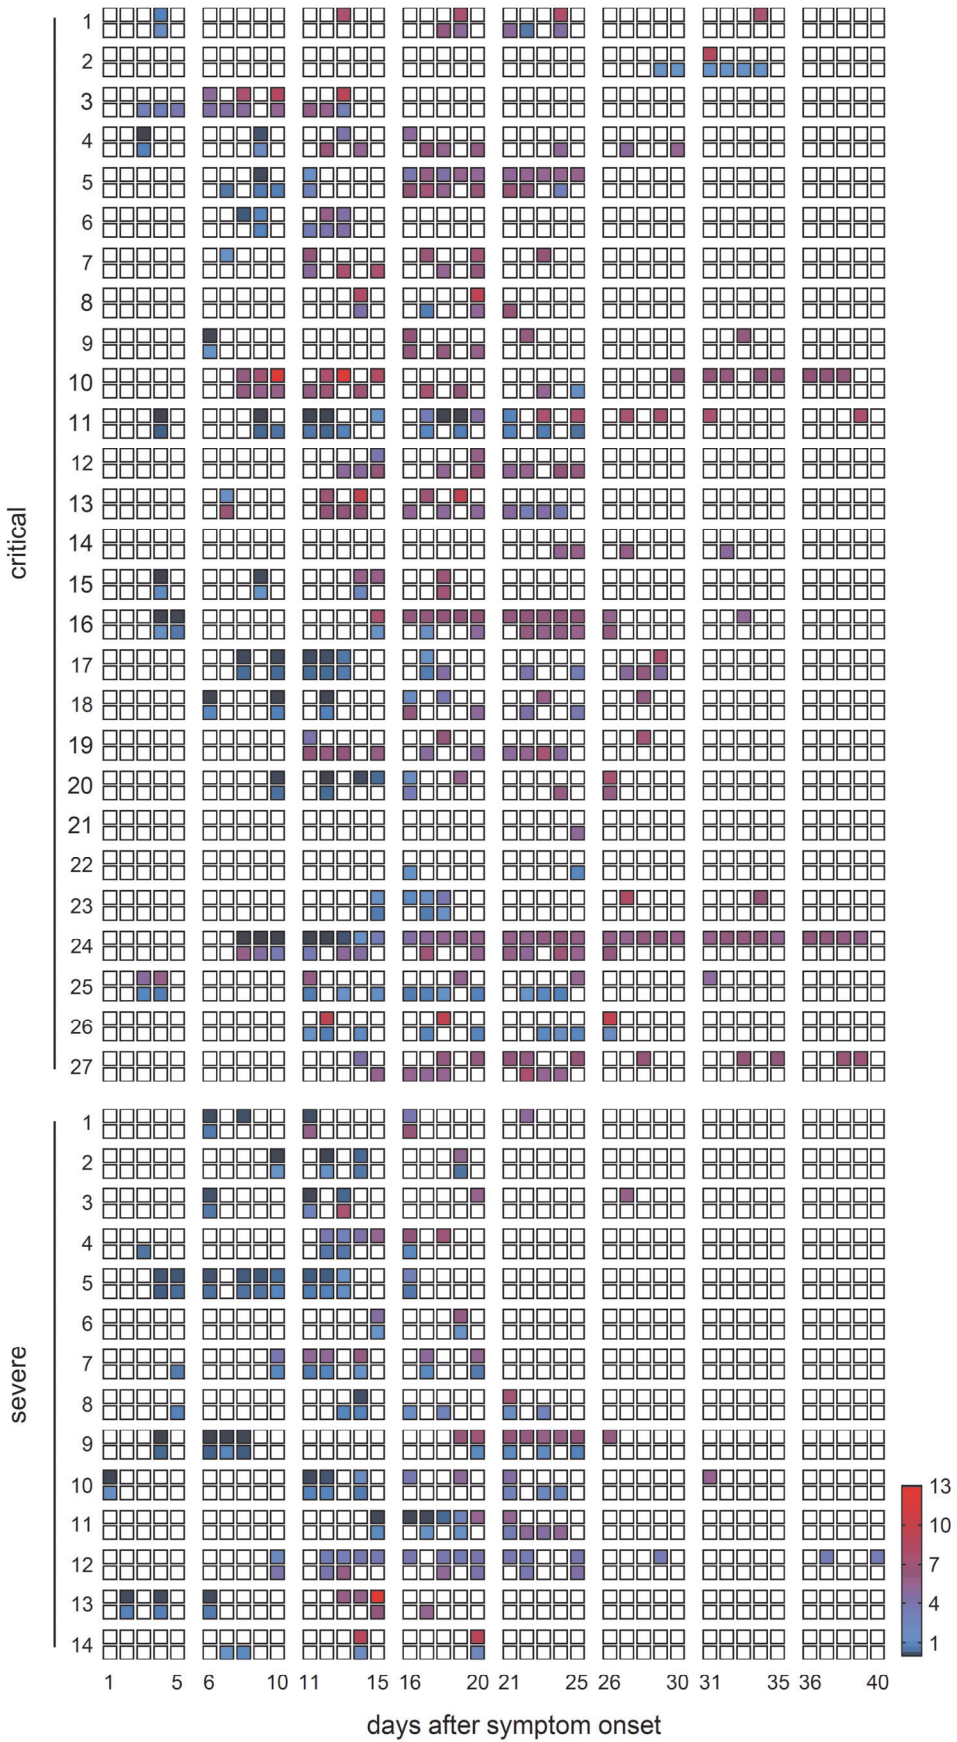

979

980 **Figure 4 – figure supplement 4**

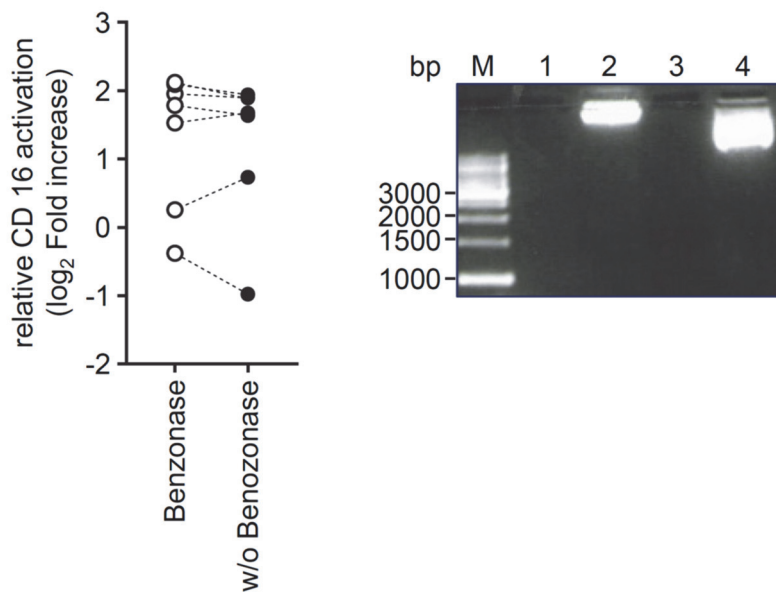

981

982 **Figure 5**

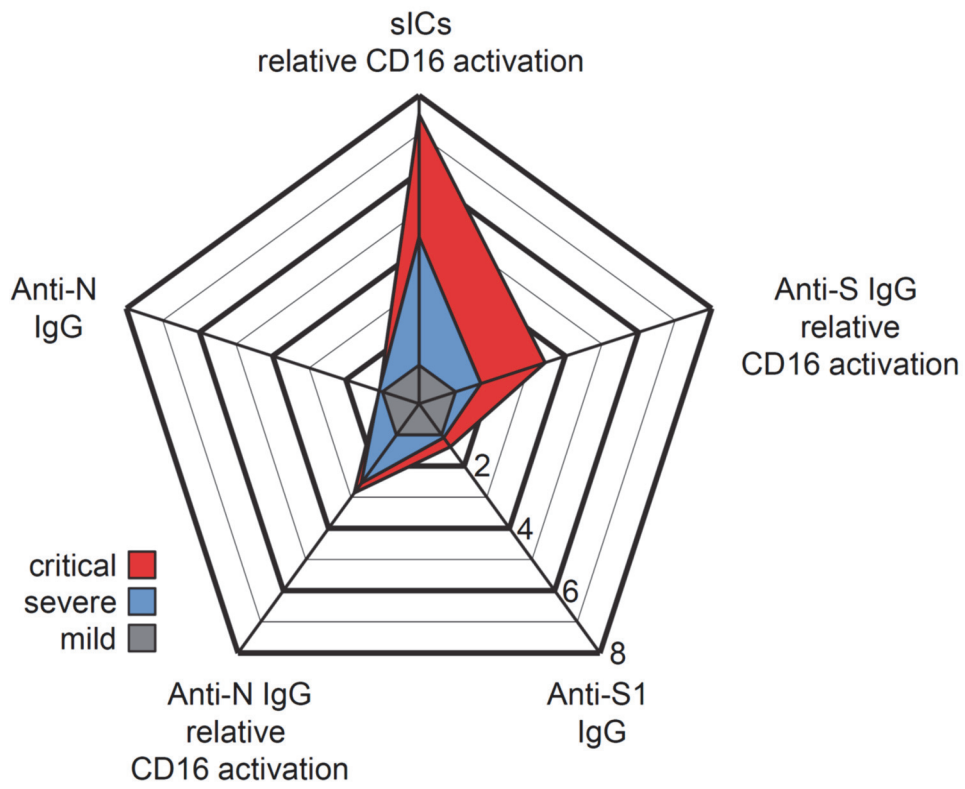

983

984
